1 **Running head:** Everyday-life and experimental habits

2

3

4

5

6 **Striatal role in everyday-life and laboratory-developed habits**

7 Pasqualina Guida<sup>1,2,6\*</sup>, Mario Michiels<sup>1,2,6\*</sup>, Peter Redgrave<sup>5</sup>, David Luque<sup>3,4</sup>, Ignacio

8 Obeso<sup>1,2</sup>

9 \* Co-first authors

10

11 <sup>1</sup>*CINAC, Hospital Universitario HM Puerta del Sur, Móstoles, Madrid, Spain*

12 <sup>2</sup>*CIBERNED, Instituto de Salud Carlos III, Madrid, Spain*

13 <sup>3</sup>*Departamento de Psicología Básica, Autónoma de Madrid University, Madrid, Spain*

14 <sup>4</sup>*Departamento de Psicología Básica, Universidad de Málaga, Madrid, Spain*

15 <sup>5</sup>*Department of Psychology, University of Sheffield, Sheffield, S10 2TN, UK*

16 <sup>6</sup>*PhD program in Neuroscience, Autónoma de Madrid University, 28029 Madrid, Spain*

17

18

19 Correspondence to Dr. Ignacio Obeso

20 Avda. Carlos V, 70

21 Móstoles, 28938

22 Spain

23 [iobeso.hmcinac@hmhospitales.com](mailto:iobeso.hmcinac@hmhospitales.com)

24

25

## Everyday life & Experimental Habits

26

### **Abstract**

27

The dorsolateral striatum plays a major role in stimulus-response habits that are learned in the experimental laboratory. Here, we use meta-analytic procedures to identify the neural circuits activated during the execution of stimulus-response behaviours acquired in everyday-life and those activated by habits acquired in the laboratory. In the case of everyday-life habits we dissociated motor and associative components. We found that motor-dominant stimulus-response associations developed outside the laboratory engaged posterior dorsal putamen, supplementary motor area (SMA) and cerebellum. Associative components were also represented in the posterior putamen. Meanwhile, newly learned habits relied more on the anterior putamen with activation expanding to caudate and nucleus accumbens. Importantly, common neural representations for both naturalistic and laboratory based habits were found in posterior left and anterior right putamen. Our findings suggest a common striatal substrate for behaviours with significant stimulus-response associations, independently of whether they were acquired in the laboratory or everyday-life.

40

41

*Keywords:* habits, everyday-life, probabilistic learning, cortex, striatum, meta-analysis, fMRI

42

## Everyday life & Experimental Habits

### 43 **Introduction**

44           Much of human behaviour can become automated and executed without conscious  
45 thought and attention. Thus, over time, a vast array of sometimes sophisticated movements,  
46 thoughts, attitudes and motivations can be performed under automatic stimulus-response  
47 control. Typically, we refer to such behaviour as *habits*. Throughout life, repeated  
48 associations between representations of specific stimuli and particular responses enable  
49 stimulus-evoked behaviour to be enacted without conscious intervention <sup>1</sup>. This allows us to  
50 perform tasks with reliable stimulus-response components without thought, while at the  
51 same time, allowing conscious attention to be directed to less predictable aspects of the  
52 world. An obvious example would be not having to think about putting one foot in front of the  
53 other when walking to an interview. Hence, numerous habitual routines are constructed by  
54 humans to manage the simultaneous enactment of multiple tasks – walking and talking <sup>2</sup>.

55           A significant feature of habitual behaviour is it occurs independently of how valuable  
56 or appropriate the outcome is <sup>3,4</sup>. An example would be habitually pressing the lift/elevator  
57 button taking you to the floor of your old office, rather than the new one. Automatic habitual  
58 control is often contrasted with conscious goal-directed processing where action selection is  
59 determined by the value/appropriateness of the predicted outcome <sup>3,5,6</sup>. Typically, before  
60 statistical regularities in the task are established, adaptive goal-directed control is slower but  
61 more flexible. Thus, early in instrumental learning, and in uncertain situations, flexible goal-  
62 directed control is normally deployed.

63           Until recently, habits have been studied in experimental settings where new stimulus-  
64 response relationships are learned in the laboratory. However, it is of great interest to  
65 understand how automatic habitual control operates in the normal circumstances of  
66 everyday life. It is also important to understand how brain disorders such as Parkinson's  
67 disease <sup>7,8</sup>, obsessive-compulsive disorder <sup>9</sup>, and drug addictions <sup>10</sup> lead to clinically  
68 dysfunctional patterns of habitual use of behaviour. Despite the importance of habitual

## Everyday life & Experimental Habits

69 control in daily life and clinical pathology, formal investigation of the inherent stimulus-  
70 response associations established in everyday life is in its infancy. However, even at this  
71 early stage, an important question is whether the neural circuits engaged by habits acquired  
72 in daily life are the same or different to those activated when newly acquired habits are  
73 performed in the laboratory. The purpose of the present investigation was therefore to  
74 compare the patterns of neural activation evoked by long-acquired habits brought into the  
75 laboratory with those established under formal experimental conditions.

76 Experimental research with animals has shown how instrumental learning occurs  
77 through initial goal-directed computations that later transition into stimulus-response  
78 mappings <sup>11</sup>. The formal experimental paradigms (see Box 1 for a summary) used to  
79 distinguish habits from goal-directed actions include (amongst others) outcome devaluation  
80 or contingency degradation tests (Adams, 1982; Balleine and O'Doherty, 2010; Dickinson et  
81 al., 1985; for a review see Foerde, 2018). In both cases, if the behaviour persists after the  
82 outcome has been devalued or the outcome is no longer related to responding, the  
83 behaviour is deemed to be under habitual control. The formal procedures developed in  
84 animal studies have been imported into human experiments <sup>14-18</sup>. Significantly, human  
85 neuroimaging studies have revealed activation of the rostro-medial (associative) striatum  
86 during the initial stages of instrumental learning, which gradually shifted to caudo-lateral  
87 (sensorimotor) regions of the striatum when habitual control of the instrumental task became  
88 evident <sup>14,19-24</sup>. These findings concur with those in non-human animals that demonstrate a  
89 similar involvement of the rostro-medial striatal territories early, and caudo-lateral regions  
90 later in the acquisition of instrumental tasks <sup>11</sup>.

91 To date, most of the literature investigating the neural basis of habits in humans has  
92 relied on subjects developing new experimental habits in the laboratory under formal  
93 experimental conditions (Box 1B). This approach, has provided important information about  
94 the relationship between habitual and goal-directed neural systems <sup>11</sup> and the factors

## Everyday life & Experimental Habits

95 (repetition, rewards or environmental cues) that promote the formation of habitual control <sup>25</sup>.  
96 However, this approach faces several challenges. The most pressing is the difficulty of  
97 creating habits in an experimental situation that are equivalent to those developed in normal  
98 everyday life. For example, a basic tenet of habit theory is that stimulus-response  
99 associations typically get stronger with repetition. It is therefore, not exactly inspiring that  
100 several studies have failed to report a direct positive relationship between the amount of  
101 training and the strength of habitual responses measured in their experimental settings <sup>26,27</sup>.

102 An alternative and increasingly important way forward to study habits in humans is to  
103 have everyday habitual behaviour learned during a subjects lifetime brought into the  
104 laboratory for investigation. Certain behaviours in normal life including driving, eating,  
105 dancing, reading, talking or walking have significant stimulus-response components that can  
106 be performed automatically while the person's conscious attention is directed elsewhere <sup>28,29</sup>.  
107 It is likely these components have been acquired through a life-time of everyday trials.  
108 Therefore, such associations come to the laboratory fully formed and do not depend upon on  
109 the multiple trial learning that is required to develop new experimental habitual behaviour.  
110 The principal challenge in studying naturalistic habits is getting subjects to express long-  
111 established stimulus-response behaviour in a laboratory setting. This is necessary so that  
112 both the automatic behaviour and associated neural activity can be measured quantitatively.

113 Investigators of everyday habits have chosen behaviours that have critical automatic  
114 stimulus-response components <sup>30</sup> and versions that can be performed in the laboratory while  
115 BOLD signals are measured by fMRI imaging. Examples of such tasks include reading,  
116 where comparisons are made between real words of different familiarity and emotional  
117 content, foreign words and pseudo-words <sup>31</sup>; writing and drawing <sup>32,33</sup> walking on a special  
118 apparatus <sup>34</sup>; and driving an MR-compatible driving simulator (Box 1A; Choi et al., 2017;  
119 Cummine et al., 2016; Huth et al., 2016; Karimpoor et al., 2015; Martínez et al., 2016, 2018;  
120 Oberhuber et al., 2013; Varotto et al., 2020; Yang et al., 2018). The specific question we

## Everyday life & Experimental Habits

121 were interested in is whether recently established laboratory habits and those developed in  
122 everyday life engaged the same, partially overlapping or separate neural circuits in the brain.

123         The purpose of the present investigation was therefore to directly compare the neural  
124 signatures evoked by novel, laboratory-developed habits and those acquired over a life-time  
125 (Figure 1). To answer this question, we conducted a quantitative meta-analysis to  
126 investigate the neural substrates of everyday life and experimental habits. First, to select a  
127 cohort of studies investigating naturalistic habits, we took data from 54 studies (a total of  
128 1441 subjects) that had used diverse stimulus-response paradigms (walking, reading, writing  
129 and driving). Imaging models that included automatic parameters on each task were chosen  
130 (Table S1). Meanwhile, we included categorical variables that separated motor (walking,  
131 driving) and cognitive (reading, writing) habits acquired in daily life, a further sub-division  
132 motivated by the anatomo-functional gradient along fronto-striatal circuits<sup>41</sup>. Second, we  
133 sought to confirm the neural basis of experimental habits in the 40 studies (a total of 973  
134 subjects) that had used probabilistic or discriminative learning, 2-step learning or sequential  
135 tasks to test for the laboratory development of novel habits (Box 1B). Studies of  
136 experimental habits were separated into two subcategories: probabilistic learning vs other  
137 experimental tasks (Table S2), on the ground that probabilistic classification typically  
138 activates more anterior portions of the caudate and the putamen, compared with other tasks  
139<sup>22</sup>. This novel approach allowed the neural signatures of stimulus-response behaviour  
140 developed in the laboratory and in everyday life to be compared directly. Special interest  
141 was focused on the system-level circuits involving the basal ganglia (Figure 1). The resulting  
142 information provides important clues into the organisation of normal habits against which  
143 pathologies of habit and the results of therapeutic interventions can be referenced.

## Everyday life & Experimental Habits

144

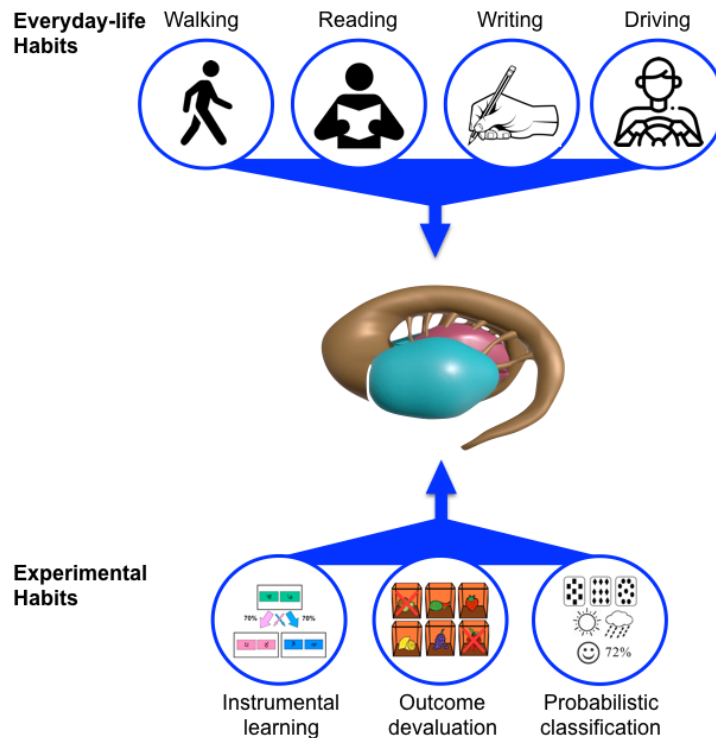

145 **Figure 1.** Hypothesis diagram on striatal role in both everyday-life and experimental habits. Activities  
146 part of daily life such as writing, reading, walking or driving were selected as everyday-life habits (see  
147 Box 1 for task measurements and details) to expect a critical striatal role in executing these habits  
148 forms. Similar striatal activities can be expected compared to experimental paradigms commonly  
149 used in the cognitive science literature.

150

## 151 Methods

152 **Selection of studies.** We conducted 2 independent searches in PubMed to  
153 identify fMRI studies investigating stimulus-response habits acquired (1) in everyday life and  
154 (2) in experimental laboratories. The search of articles related to everyday habits was  
155 focused on natural behaviours where an important automatic stimulus-response component  
156 would be expected (e.g. walking, speech, reading, etc). Selection of these activities was  
157 based on their potential link to fundamental basal ganglia functions (Figure 1). A summary of  
158 typical measures used in these studies is presented in Box 1. In the search for laboratory  
159 based habits we included articles referenced by Patterson & Knowlton (2018) plus all new  
160 relevant articles published since their last search (June 22, 2017) and March 26, 2021. To

## Everyday life & Experimental Habits

161 enable direct comparison with, and extension of, the Patterson and Knowlton review (2018),  
162 we conducted our literature search using the same key search terms and included the task  
163 categories – probabilistic learning, discriminative learning and sequence learning (see Box  
164 1). We also included relevant MeSH terms available in Pubmed. This allowed us to find  
165 articles that do not include targeted keywords in the title or abstract but have proper MeSH  
166 terms linked to their metadata. The complete list of our search terms can be found in  
167 Supplementary Material. To set limits on inclusion, the articles were filtered according to the  
168 following criteria:

- 169 (1) Spatial coordinates from human brain fMRI reported in standardized  
170 stereotaxic space (MNI or Talairach space). Other functional imaging methods (e.g., PET,  
171 EEG source imaging, etc) were excluded;
- 172 (2) Healthy subjects over 18 years old were included, as were the healthy  
173 participants within clinical studies with independent analyses for the healthy controls;
- 174 (3) At least 6 subjects;
- 175 (4) Whole-brain analysis. ROI analyses were excluded as they can be biased by  
176 the study hypothesis and may not report all significant regions;
- 177 (5) For studies using the two-step probabilistic tasks and analyzing prediction  
178 errors from computational models, we included results associated with model-free (reward  
179 prediction error, RPE), but not from model-based errors (state prediction error, SPE);
- 180 (6) When a study contained multiple experiments and/or contrasts, the contrasts  
181 selected were based on the task condition and comparisons linked to stimulus-response  
182 behaviours (see Table S1 and S2);
- 183 (7) Studies reporting original data and published in English peer-reviewed  
184 journals (reviews and meta-analysis were excluded).

185 We then performed a second-step control using reference lists from already  
186 included articles. From the list of references, we first excluded articles whose title had no  
187 direct link to any of our inclusion criteria. From the remaining articles that met our inclusion



## Everyday life & Experimental Habits

188 criteria we found 17 that had investigated everyday-life habits and 14 articles that had  
189 investigated laboratory-developed habits. Since our second exclusion step involved manual,  
190 rather than online searching, we were able to include articles published before 2017 not  
191 included in Patterson and Knowlton (2018). These additional references were selected  
192 because: (1) we checked all references from the list of accepted papers, not only those in  
193 major review articles; and (2) our criteria allowed us to include studies that did not report  
194 putative habit-related activation of the dorsal striatum (caudate, putamen, or both). Figure S1  
195 depicts the identification, screening, eligibility and selection stages we used to select studies  
196 for inclusion.

197 We included a total of 54 studies investigating everyday-life habits (31 involved  
198 cognitive tasks: writing, reading; and 23 studied motor tasks: walking, driving; Table S1). A  
199 total of 40 studies involved reported experimental habits (20 involved probabilistic learning;  
200 and 20 studied other experimental tasks; Table S2). Foci, scripts and statistical maps can be  
201 accessed in the Open Science Framework (<https://osf.io/w5ftm>).

202 **Data analysis.** The latest version of the GingerALE software v3.0.2<sup>42</sup> was used to  
203 compute activation likelihood estimations (ALE)<sup>43</sup>. From each of the accepted articles, the  
204 coordinates of peak activations were manually extracted and those in Talairach space were  
205 transformed to Montreal Neurological Institute (MNI) space using the inverse transform of  
206 `icbm2tal` from GingerALE<sup>44</sup>. The ALE method was implemented as follows: (1) for each  
207 study a 3D Gaussian distribution was created around every peak activation (variance  
208 proportional to the sample size of the study). This allowed us to use the higher statistical  
209 power to reduce peak uncertainty in studies with larger sample sizes. This step was done for  
210 every peak to produce one modelled activation (MA) map per study. The value for each  
211 voxel in a MA-map represented the probability of that voxel containing an activation foci. (2)  
212 Voxel probabilities in all MA-maps were merged to produce an ALE map. Following  
213 recommendations of Eickhoff et al., (2016), the ALE map was thresholded using a cluster-

## Everyday life & Experimental Habits

214 level Family-Wise Error (FWE), with a cluster-forming threshold of .001 and a cluster-level  
215 FWE of .05 (as stated in the GingerALE manual; Fox et al., 2013).

216 The first step in applying a cluster-level FWE was to threshold the ALE map at the  
217 voxel-level (cluster-forming threshold). To do this, all possible combinations between all  
218 peaks from each MA-map were tested. The ALE values provided a null distribution which  
219 assumed the peaks would be randomly distributed following all potential combinations  
220 amongst them. Here, an uncorrected  $p$ -value was used since in the next step, a FWE  
221 correction was applied to correct for the possibility of multiple comparison errors.

222 Then, an additional threshold (cluster-level FWE) was applied to select only the  
223 largest clusters. Peaks in every MA-map were distributed randomly and then combined into  
224 a single ALE map, following the same union method described above for the voxel-level  
225 threshold. The ALE maps were also thresholded with the same method used at the voxel-  
226 level threshold. This procedure was repeated (1000 times for this meta-analysis) using  
227 Monte Carlo permutations method, selecting on every run the largest cluster in the  
228 thresholded ALE map (null distribution). Finally, we applied the selected threshold (0.05) to  
229 obtain the FWE-corrected results. Using a 0.05 cluster-level threshold resulted in a  
230 thresholded map where only 5% of the surviving clusters could have been introduced by  
231 chance (false positives), following guidelines to discard non-significant clusters <sup>42</sup>.

232 Contrasts between thresholded ALE maps were computed to compare between our  
233 conditions of interest (e.g. Everyday-life > Experimental maps). All foci in the selected  
234 studies were pooled into a single dataset, which we then split in two datasets by randomly  
235 assigning to each one the same number of foci in their original file. The ALE-scores of these  
236 two random maps were then subtracted in a voxel-wise manner generating the map of their  
237 ALE-scores differences (repeated 10000 times to record ALE-scores and generate a null  
238 distribution of randomly spatially distributed foci). Finally, the actual two ALE maps  
239 corresponding to the contrast were combined voxel-wise by subtracting the ALE-score of

## Everyday life & Experimental Habits

240 one map from the other. The resulting map of ALE-scores were then thresholded voxel-by-  
241 voxel by comparing them with the null distribution previously obtained. We used the default  
242  $p$ -value suggested in GingerALE (0.01 uncorrected). All computations were run via in-house  
243 python scripts to automate analyses in the GingerALE's interface. Thresholded maps are  
244 reported in MNI152 space <sup>47</sup>.

245

## 246 **Results**

### 247 ***Striatal role in everyday and experimental habits***

248 To find the neural signatures of everyday habits, we obtained cluster activity  
249 associated with stimulus-response behaviours learned throughout life, compared with those  
250 newly learnt in an experimental laboratory. The main effects of naturalistic habits revealed  
251 significant bilateral activity in the posterior putamen (Table 1; Figure 2A). Specifically, this  
252 was sustained by activity in dorsal sections and left putamen activation that expanded to its  
253 posterior boundary (Table 1; Figure 2A-B). For these tasks, other active regions were seen  
254 in the cerebellum and cortical areas including the premotor and SMA (Table 1; Figure 2A-B).

255 Habits established in laboratory settings were also associated with increased levels  
256 of activation in putaminal sections, but with larger representations in anterior striatum (Figure  
257 2C). A gradient was seen along the rostro-ventral section of the putamen, right caudate and  
258 the nucleus accumbens bilaterally (Table 2; Figure 2C). These results confirm the striatum  
259 as the most significant region for newly acquired experimental habits (Table 2; Figure 2C) <sup>22</sup>.  
260 They were also consistent with the idea that stimulus-response associations learned in the  
261 laboratory would depend more on rostral striatal activity. The right insula was one of the  
262 extrastriatal hubs of activity associated with habits acquired in the laboratory (Table 2; Figure  
263 2A). These findings align with the evidence that sensorimotor territories of the striatum are a  
264 critical for the expression of habitual behaviour, but with more rostral patterns of activity  
265 observed when experimental habits were developed in laboratory setting.

## Everyday life & Experimental Habits

266           Of particular interest in this investigation was the possibility that despite the  
267 differences between neural activation patterns associated with everyday and experimental  
268 habits, there may be a common neural substrate accessed by both forms of stimulus-  
269 response behaviour. Common activations were seen in anterior right putamen and posterior  
270 left putamen (Figure 2A). Although both categories of habits recruited dorsal sub-regions of  
271 the putamen bilaterally, the activation by everyday habits was stronger (Figure 2C).  
272 Unexpectedly, no activation in the caudate nucleus survived FWE-corrected thresholds with  
273 everyday habits. In contrast, habits acquired in the laboratory showed a differential  
274 recruitment of the nucleus accumbens, and to a lesser extent, the most antero-ventral  
275 section of the right caudate nucleus and putamen (Figure 2C). Hence, while the striatum is a  
276 common hub for both categories of habitual behaviour, antero-posterior differences were  
277 reflected in the activation patterns of habits acquired in everyday life and the experimental  
278 laboratory.

## Everyday life & Experimental Habits

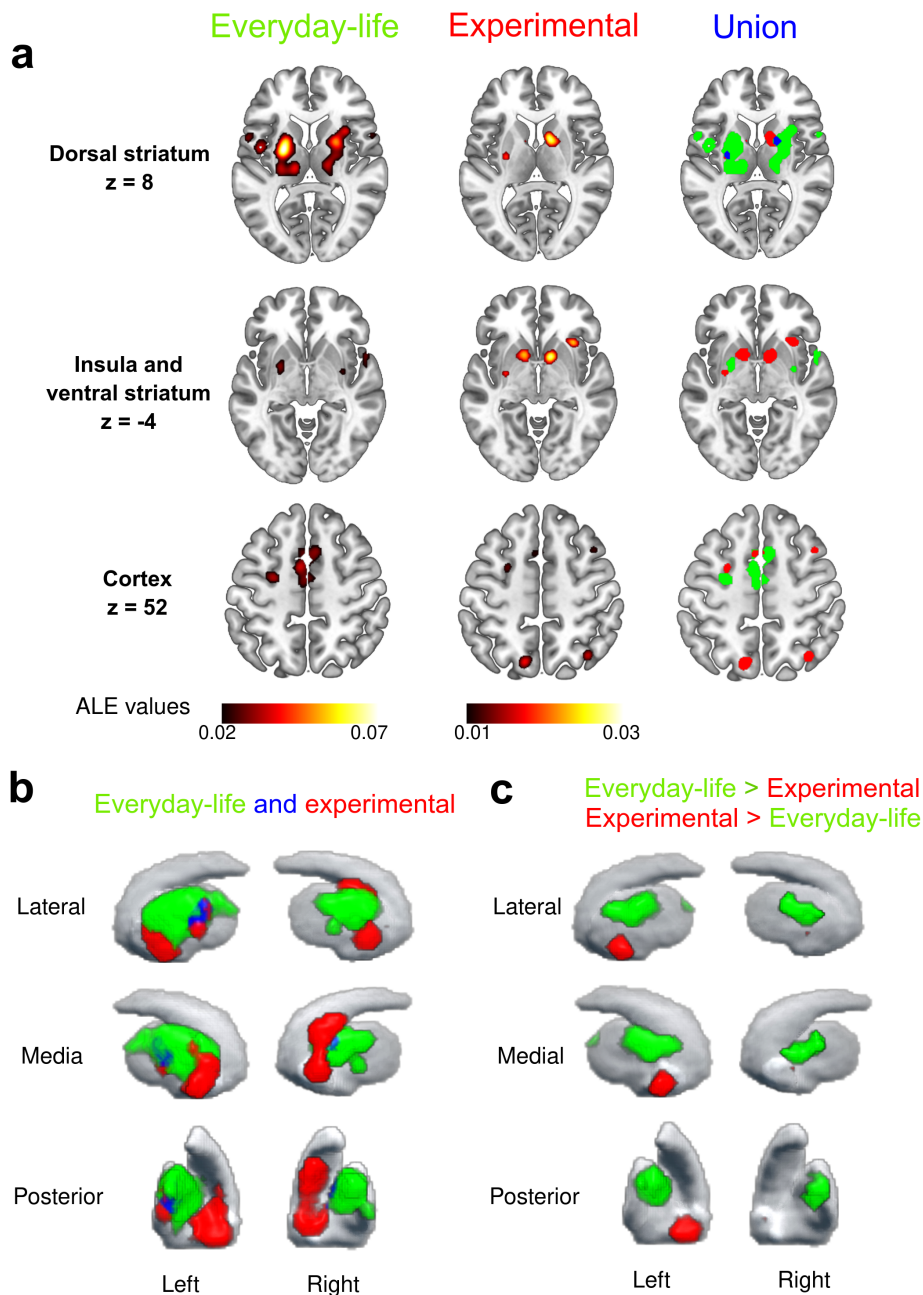

279

280 **Figure 2.** Everyday-life and experimental thresholded activation maps. **a)** Axial views for the main  
 281 regions. Overlap regions at the right column are shown in blue. Note that there exists activation in the  
 282 cerebellar cortex for the case of everyday-life studies but it is omitted here for brevity. Z=52 view for  
 283 the experimental studies is shown as an unthresholded map for visualization purposes (ALE value  $\approx$   
 284 0.01) **(b)** 3D striatum reconstruction showing all the activation that fall inside it. Overlap regions at the  
 285 right column are shown in blue. **(c)** 3D striatum reconstruction showing the differential activation of the  
 286 Everyday -life > Experimental contrast (in green) and the Experimental > Everyday-life contrast (in  
 287 red).

288

289 **Motor and associative segregation in life-long habits**

## Everyday life & Experimental Habits

290 We next tested whether the neural correlates of everyday habits varied between  
291 sensorimotor routines (walking or driving) and cognitive-associative ones (reading or  
292 writing). While all representations of habitual behaviour are characterized by stimulus-  
293 response associations, for different tasks these may be represented in different sensorimotor  
294 networks with differential connections to the basal ganglia. Clustered activation in motor  
295 tasks revealed a significant presence along the dorsal putamen compared with the  
296 associative tasks (Figure 3A). In addition, motor tasks extended the pattern of activation into  
297 more posterior sections of the right putamen, but only dorsally for the left putamen. This  
298 cluster was present across all the antero-posterior axes (Figure 3B).

299 In the case of associative habits acquired in everyday life, we observed an activation  
300 pattern in ventral sections of the putamen bilaterally (Figure 3A). This effect showed  
301 significant bilateral asymmetry favouring the left putamen where activation extended into  
302 more posterior regions. This was absent in the walking and driving tasks (Figure 3A).

303 Outside the striatum at the cortical level, the associative tasks acquired in everyday  
304 life recruited premotor area and SMA. Activation was also observed in the cerebellum  
305 (Figure 3A). The same cortical regions were recruited during the walking and driving tasks,  
306 but none survived FWE-corrected thresholds. Greater activation for the associative cognitive  
307 tasks was expected given the more complex computational requirements when writing or  
308 reading<sup>48</sup>. Such tasks are known to engage larger regions of cortical tissue<sup>49</sup>.

309 To further investigate the failure of our thresholding procedures to detect activation in  
310 the caudate nucleus for any of the naturalistic habit categories, we included the distribution  
311 of all the foci that fell into the striatum in both categories of everyday habits (Figure 3C). This  
312 allowed activity in the right caudate to be observed (Figure 3C) in some associative studies,  
313 but not for the motor ones. For the left caudate nucleus, no foci were reported in any study,  
314 which confirms the absence of activity reported in the thresholded maps above.

## Everyday life & Experimental Habits

315            These findings provide insights into possible parallel habitual mechanisms in motor-  
316    associative domains that may share regions of the posterior putamen for motor activities, but  
317    a broader network for actions that require higher-order cognition. Given the stimulus-  
318    response associations involved in everyday habits will simultaneously engage multiple  
319    mechanisms, including visuo-spatial attention, movement planning and execution, the neural  
320    substrate of cognitive and sensorimotor habits should be segregated.

## Everyday life & Experimental Habits

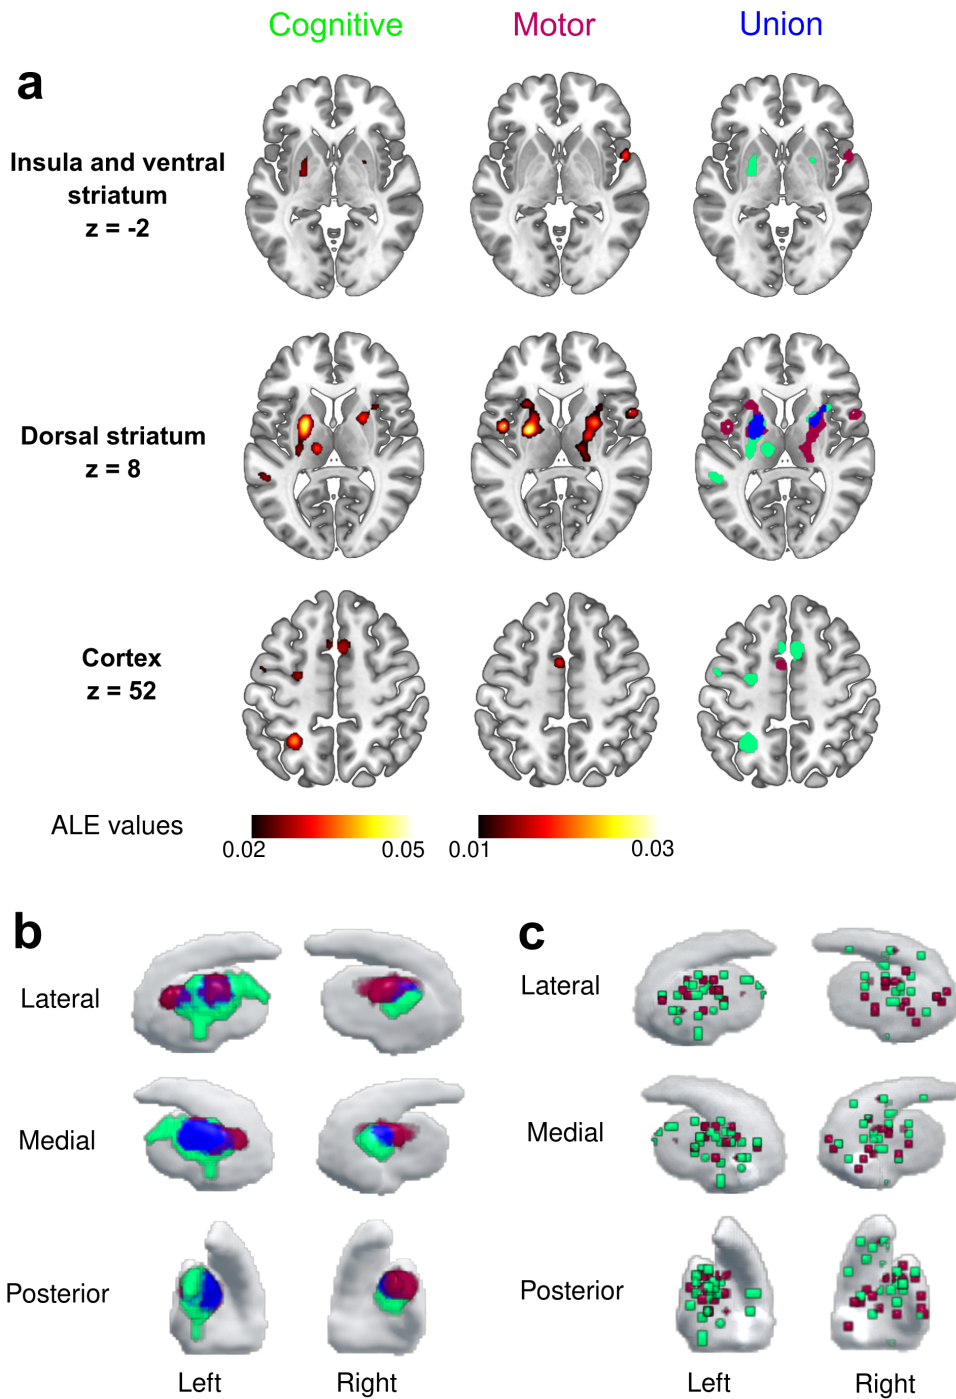

321

322 **Figure 3.** Everyday-life cognitive-motor subcategories thresholded activation maps. **a)** Axial  
323 views for the main regions. Overlap regions at the right column are shown in blue. **b)** 3D  
324 striatum reconstruction showing all the activation that fall inside it. Overlap regions at the  
325 right column are shown in blue. **c)** Foci distribution of all the studies that fall in the striatum.  
326 Note that some foci may correspond to the same study.

327



## Everyday life & Experimental Habits

### 328 ***Probabilistic learning and other tasks segregation in experimental habits***

329           Finally, we aimed to replicate previous findings on laboratory conditions that have  
330 linked the striatum to the learning and execution of new habits. Consistent striatal activity  
331 has been reported when evaluating probabilistic or discriminative learning, 2-step learning  
332 and sequential tasks<sup>22</sup>. Here, we intended to confirm and update these results with more  
333 recent findings by separating studies that involve trial-and-error probabilistic reward learning  
334 from those that used different methodologies for stimulus learning. As predicted, both  
335 probabilistic learning and the other tasks showed common regions of striatal activation, with  
336 largest clusters in the nucleus accumbens and rostro-ventral sections of the caudate and  
337 putamen (Figure 4A). However, only the probabilistic tasks were associated with bilateral  
338 recruitment of the most anterior region of the putamen (Figure 4B). This results confirms  
339 previous findings reported by Patterson and Knowlton, (2018). Similarly, the other  
340 experimental tasks differed with respect to the probabilistic ones by demonstrating unilateral  
341 recruitment of the left rostral caudate nucleus (Figure 4B). Outside the striatum, left insular  
342 cortex was activated in other tasks but not by the probabilistic ones (Figure 4A). This could  
343 reflect a form of residual goal-directed activity due to the insula's complementary role in  
344 evaluating future rewards in the decision phase<sup>50</sup>.

Everyday life & Experimental Habits

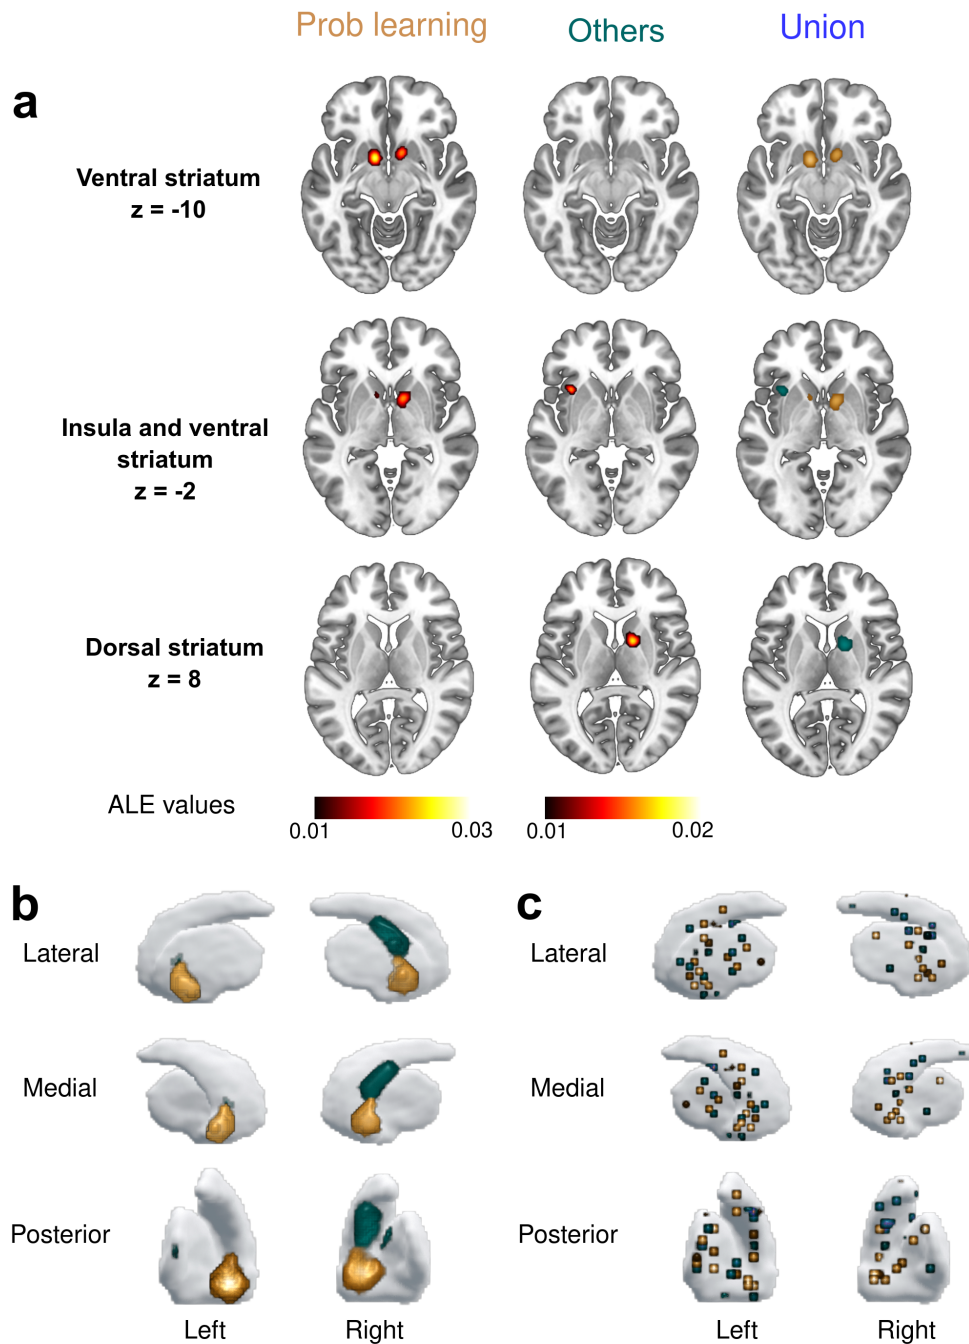

345

346 **Figure 4.** Experimental subcategories thresholded activation maps. **a)** Axial views for the  
 347 main regions. In this case there are no overlap regions at the right column. **b)** 3D striatum  
 348 reconstruction showing all the activation that fall inside it. In this case there are no overlap  
 349 regions at the right column. **c)** Foci distribution of all the studies that fall in the striatum. Note  
 350 that some foci may correspond to the same study.

351

352 **Discussion**

## Everyday life & Experimental Habits

353 Our meta-analysis has identified two distinct types of habit-related mechanisms in the  
354 human striatum, by comparing long-established habits acquired in everyday life with newly  
355 learned habits acquired under laboratory-controlled conditions. The results of our  
356 investigation revealed both common and diverse functional links between different sub-  
357 regions of the brain's habitual circuitry. Naturalistic habits showed enhanced activity in the  
358 dorsal posterior putamen, together with activity in the cerebellum and SMA. In contrast,  
359 laboratory acquired habits engaged anterior sections of the putamen with activation  
360 expanding to caudate nucleus and nucleus accumbens. However, common regions of  
361 activation were found in posterior left and anterior right putamen. Ultimately, delineation of  
362 specific striatal contributions to motor-associative variables embedded in habits were  
363 responsible for shared anatomical patterns in everyday-life associative habits, such as  
364 reading and writing, that engaged rostral regions of the putamen.

365 The current findings provide direct evidence for bilateral putamen engagement in  
366 habits acquired and executed in everyday life. Typically, we observed larger bilateral activity  
367 in studies of long-established habits compared with newly acquired experimental ones. This  
368 may implicate a broad putaminal role for the stimuli-rich sensorimotor computations required  
369 during complex stimulus-response tasks enacted in everyday life. Consistent with this view,  
370 neuroimaging, lesion and animal electrophysiological data all converge to pinpoint a role for  
371 the putamen in the integration of movement units and stimulus associations to produce  
372 behaviour with a predicted outcome <sup>51-55</sup>. Indeed, the neurophysiological properties of the  
373 putamen are supported by a subpopulation of neurons that respond to sensory stimuli <sup>56</sup>,  
374 unifying actions sets for movement sequences <sup>57,58</sup> or integrating elementary movement  
375 units such as individual finger moves <sup>59</sup>. Moreover, its activity is not solely dedicated to  
376 movement parameters, but also in the absence of motor plans <sup>60</sup>, increasing response  
377 magnitude to the reinforced choice <sup>61</sup> and for predicted well-learned and contextually-driven  
378 actions <sup>62-67</sup>. Hence, the diversity of sensory-related and high-order reinforcement neurons in  
379 the putamen support a pivotal role in context-rich scenarios at several levels (sensorimotor,

## Everyday life & Experimental Habits

380 predicted actions, object value, habitual action execution). We interpret the association of  
381 putamen activity with habits in everyday life being due to its physiological and reinforcement  
382 properties contributing to action sequence-specific and context-specific behaviour.

383         The role of the putamen in habitual behaviour is directly influenced by ascending  
384 dopaminergic system acting on cortical and thalamic inputs<sup>68</sup>. Dopamine provides critical  
385 modulatory influences on striatal subregions whereby projections from substantia nigra pars  
386 compacta and the ventral tegmental area differentially target terminals in dorsal and ventral  
387 striatum respectively<sup>69</sup>. The main nigrostriatal projection is topographically organised with a  
388 medial to lateral gradient<sup>70</sup>. Tonic firing within this system sustains, motivational, cognitive  
389 and action-specific decision making<sup>71,72</sup>, while sensory-evoked phasic patterns of  
390 dopaminergic activity provide a general mechanism for reinforcement learning<sup>73,74</sup>. The  
391 large bilateral activity found in the striatum for the routines of everyday life should be  
392 influenced by ascending dopaminergic fibers with the abovementioned functional properties  
393 that likely contribute to sensorimotor control while writing or walking (proprioceptive and  
394 muscle control). As well, dopaminergic projections will fire phasically to unpredicted  
395 associative cues present in everyday life<sup>75</sup>. Hence, the putamen will likely respond  
396 preferentially to the sensorimotor contingences present in highly-organised actions that rely  
397 on automatic stimulus-response associations that characterise habitual responding.

398         A second key contributor comes from particular cortical structures that regulate the  
399 expression of habits<sup>23,67,76,77</sup>. In the present study we found that SMA activity was an  
400 essential component of the habitual circuitry present for the everyday tasks. The SMA  
401 represents one of the important junctions between cortical-subcortical motor and cognitive  
402 circuits<sup>78</sup>. It has projections to the dorso-lateral striatum and posterior putamen<sup>79</sup>, a  
403 pathway subject to neuromodulation by non-invasive brain stimulation<sup>80</sup>. The SMA has  
404 been shown to be involved in learning stimulus-response contingencies<sup>78,81</sup> and model-free  
405 tasks<sup>82</sup>. Multi-dimensional components required while driving or even walking  
406 (somatosensory, visuo-spatial, prediction, motor planning, etc) will be mediated via cortical

## Everyday life & Experimental Habits

407 inputs to the putamen<sup>83,84</sup>. How the putamen might operate on this range of input would be  
408 to perform sequential selections of stimuli that trigger previously acquired stimulus-response  
409 associations. When bolted together such serial selections can be viewed as coherent  
410 sequences of habitual behaviour, such as changing gear while driving, or pen movements  
411 associated with particular letters when writing. These automatic moves are likely to recruit  
412 medial cortical motor areas including the SMA, that collaborate with subcortical structures,  
413 including putamen (Cunnington et al., 2002; Smittenaar et al., 2013). Recurrent cortico-  
414 striatal loops would therefore combine to mediate sequential cognitive and motor  
415 components of habitual behaviour, both triggered by the specific sensory events they have  
416 been repeatedly associated within everyday life.

417 To investigate the possible commonalities and differences in the neural networks  
418 supporting categories of automatic behaviours acquired in everyday life, we subdivided  
419 those activities with greater motor component (walking, driving) compared to those with  
420 stronger cognitive requirements (reading and writing). This analysis was motivated by  
421 possible differences in the contribution from motor, cognitive and/or emotional circuits in the  
422 different types of everyday habitual activity<sup>88</sup>. The dorso-lateral caudal putamen was active  
423 for both cognitive (reading, writing) and motor operations (driving, walking), which  
424 corresponds with our understanding of parallel inter-related cortico-striatal functions<sup>82,89</sup>.  
425 The stimulus-response selection role of the putamen may well represent the low level  
426 sensorimotor selections necessary in all forms of habitual motor behaviour<sup>60,75</sup>. Parallel  
427 circuits have been suggested to integrate the different environmental signals that trigger  
428 motivational, cognitive and motor responses<sup>90,91</sup>. Sequential selections in different territories  
429 of the basal ganglia could be integrated by cortico-basal ganglia loops into coherent goal-  
430 directed behaviour<sup>92</sup>. The question that remains is whether each of the limbic, associative  
431 and sensorimotor territories<sup>93</sup> can all operate in stimulus-response habitual mode to elicit  
432 respectively, stimulus-evoked motivations (e.g. drug cravings), stimulus-evoked cognitions  
433 (prejudices) as well as the well-known motor habits.

## Everyday life & Experimental Habits

434           Critically, our findings also have implications for previous studies investigating new  
435 stimulus-response habits learned in experimental laboratories (probabilistic or discriminative  
436 learning, 2-step learning or sequential tasks), which also report significant striatal activations  
437 <sup>14,19,21–23,82,94–96</sup>. Specifically, our analyses show stimulus-responses behaviour acquired both  
438 in everyday-life and under experimental conditions showed common striatal activity in the  
439 right anterior putamen and left posterior putamen. The everyday-life tasks included long  
440 established sensorimotor responses triggered by sensory cues in the absence of new  
441 associative learning. In contrast, laboratory learned habits typically involved relatively minor  
442 motor components (finger key presses), but novel cue-response associations driven by  
443 reinforcement learning. In line with a previous meta-analysis on basal ganglia activation  
444 across multiple motor disciplines (Arsalidou et al., 2013), left lateralized putaminal activity  
445 was prominent in motor operations (such as eye movements and body motion), has a larger  
446 volume in right-handed participants (Peterson et al., 1993) and is critical in behaviours  
447 guided by stimulus-response mappings <sup>22,95</sup>. Hence, we interpret left posterior putamen  
448 activation being present in both long-established and novel habit forms reflecting a critical  
449 sensorimotor association embedded within every habitual response.

450           However, activation of the anterior putamen would accord well with neural patterns  
451 associated with initial learning of stimulus-response associations in experimental settings <sup>21</sup>.  
452 Activity in key regions of the circuitry associated with goal-directed behavioural control  
453 (caudate and nucleus accumbens) were also present in laboratory studies of habits. These  
454 findings match those of several fMRI studies using various reinforcement learning tasks,  
455 which report activation of the ventro-medial prefrontal cortex, insula or anterior striatum  
456 when encoding the value of predicted reward outcome linked to new actions <sup>20,50,98</sup>. Yet, the  
457 results with learning new habits may be explained by the theory and methodological  
458 procedures often used when studying habit acquisition in the laboratory. For example, part of  
459 the problem is that some of the presumed habits established in the laboratory fail to meet the  
460 formal requirement of automatic stimulus-response behaviour. Thus, several recent human

## Everyday life & Experimental Habits

461 experimental studies failed to demonstrate the expected effect of training duration on the  
462 outcome-devaluation test<sup>17,26,27</sup>. This suggests rather more trials may be needed to establish  
463 stimulus-response associations that can survive devalued outcome challenges and can be  
464 enacted automatically without thought.

465         Recently, alternative procedures have been developed to establish and test new  
466 habits in the experimental laboratory, including the sudden reversal of learned actions after  
467 overtraining<sup>18</sup>, overloading goal-directed top-down control while measuring execution of  
468 learned stimulus-response associations<sup>99</sup> or biasing movement kinematics<sup>100</sup>. Interestingly,  
469 pre-existing categorical associations established in everyday life (i.e. color associations or  
470 prejudice) have a clear advantage on measuring automatic processing<sup>30,101</sup>. Further  
471 methodological options for studying long established habits acquired in everyday life include  
472 assessing expert musicians<sup>102</sup>, tennis players<sup>103</sup> and expert shooters<sup>104</sup>. Hence, getting  
473 subjects to bring their everyday-life stimulus-response associations into the laboratory under  
474 controlled conditions is an important option for studying the neural substrates underlying  
475 habitual behaviour in humans. Although there is less control of the independent variables in  
476 such studies, by selecting subjects with different amounts of everyday life experience it is  
477 possible to relate the amount of practice with habit strength. The dependent consequences  
478 of life-long habits can be measured subsequently in the laboratory with traditional outcome  
479 devaluation, contingency degradation, or dual processing procedures-

480         Insofar as the caudal putamen has been identified as a critical node in the neural  
481 substrate responsible for automatic habitual behaviour, malfunctioning of this region has  
482 been associated with deficits in habitual performance. One notable instance is the differential  
483 loss of dopamine neurotransmission from this region in Parkinson's disease<sup>7</sup> a putative  
484 pathophysiological condition linked to the cost of life-long use of habits<sup>105</sup>. The problems  
485 Parkinson's disease patients have with walking and writing<sup>8,106,107</sup> and the new learning of  
486 experimental habits<sup>108,109</sup>, have been interpreted as an inability to express stimulus-  
487 response habits. In contrast, other neuropsychiatric complications such as addictions exhibit

## Everyday life & Experimental Habits

488 an excessive cue-dependent use of certain rewards linked to increased posterior putamen  
489 activity<sup>10,110</sup>. Hence, depending on the nature of the neurobiological disruption, the habitual  
490 system seems to be underused or overused in different clinical conditions.

491 Despite the clear positive results of our analysis certain limitations of meta-analytic  
492 procedures must be acknowledged. First, the ALE analysis can cause some parameters,  
493 such as voxel peaks, to be overlooked. Ideally, to explore the statistical activity maps of each  
494 study individually would be of great value. However, the fact that most studies did not have  
495 full imaging datasets would preclude this. Second, we included results from prior studies  
496 whose experimental focus was not on habitual behaviours acquired in everyday life.  
497 Specifically, in these studies behaviours were not formally identified as habitual using  
498 outcome devaluation or contingency degradation tests. However, it should be noted that a  
499 life-time repetition of everyday trials builds strong associations that do not depend upon new  
500 stimulus learning required in experimental studies<sup>111,112</sup>. Last, our meta-analysis included  
501 tasks with significant heterogeneity and regional foci were selected from studies with varying  
502 contrasts. To overcome these issues, we selected activity maps only from studies that  
503 reported contrasts measuring automatic components of behaviour. This suggests that our  
504 dataset has enabled us to identify activity patterns that are shared by a diverse range of  
505 human behaviours that contain a significant stimulus-response element. Consequently, it is  
506 possible that the bilateral posterior putamen acts as a critical node when practiced behaviour  
507 can be performed automatically and without thought in situations of everyday life.

508

## 509 **Conclusions**

510 The present study points to a fundamental functional role for the posterior putamen in  
511 the expression of habits acquired in everyday life. Importantly, a critical dissociation was  
512 established between different brain regions whose contributions to motor-cognitive  
513 representations of habits have, thus far, been largely indistinguishable. Conversely, the



## Everyday life & Experimental Habits

514 engagement of the anterior putamen is associated more with habits newly learned in  
515 experimental laboratories. Careful experimental protocols must be designed to identify those  
516 chunks of behaviour that are under stimulus-response control and can occur independently  
517 of outcome value or response contingency. This is true both for newly acquired associations  
518 in the laboratory and habits established in everyday life. Finally, the present study highlights  
519 the importance and value of having subjects bring life-long habits into the laboratory to be  
520 investigated and compared with recently acquired stimulus-response associations.

## Everyday life & Experimental Habits

### 521 **References**

- 522 1. Haith, A. M. & Krakauer, J. W. The multiple effects of practice: skill, habit and reduced  
523 cognitive load. *Curr. Opin. Behav. Sci.* **20**, 196–201 (2018).
- 524 2. Sun, R. Desiderata for cognitive architectures. *Philos. Psychol.* **17**, 341–373 (2004).
- 525 3. Dickinson, A., Trans, P. & Lond, R. S. Actions and habits: the development of  
526 behavioural autonomy. *Philos. Trans. R. Soc. London. B, Biol. Sci.* **308**, 67–78 (1985).
- 527 4. Miller, K. J., Shenhav, A. & Ludvig, E. A. Habits without values. *Psychological Review*  
528 **126**, 292–311 (2019).
- 529 5. Daw, N. D., Niv, Y. & Dayan, P. Uncertainty-based competition between prefrontal  
530 and dorsolateral striatal systems for behavioral control. *Nat. Neurosci.* **8**, 1704–11  
531 (2005).
- 532 6. Gläscher, J., Daw, N., Dayan, P. & O'Doherty, J. P. States versus rewards:  
533 Dissociable neural prediction error signals underlying model-based and model-free  
534 reinforcement learning. *Neuron* **66**, 585–595 (2010).
- 535 7. Redgrave, P. *et al.* Goal-directed and habitual control in the basal ganglia:  
536 Implications for Parkinson's disease. *Nature Reviews Neuroscience* **11**, 760–772  
537 (2010).
- 538 8. Bannard, C. *et al.* Reduced habit-driven errors in Parkinson's Disease. *Sci. Rep.* **9**, 1–  
539 8 (2019).
- 540 9. Gillan, C. M. Recent Developments in the Habit Hypothesis of OCD and Compulsive  
541 Disorders. in 1–21 (Springer, Berlin, Heidelberg, 2021). doi:10.1007/7854\_2020\_199
- 542 10. Sjoerds, Z. *et al.* Behavioral and neuroimaging evidence for overreliance on habit  
543 learning in alcohol-dependent patients. *Transl. Psychiatry* **3**, e337-8 (2013).

## Everyday life & Experimental Habits

- 544 11. Balleine, B. W. & O'Doherty, J. P. Human and rodent homologies in action control:  
545 Corticostriatal determinants of goal-directed and habitual action.  
546 *Neuropsychopharmacology* **35**, 48–69 (2010).
- 547 12. Adams, C. D. Variations in the Sensitivity of Instrumental Responding to Reinforcer  
548 Devaluation. *Q. J. Exp. Psychol. Sect. B* **34**, 77–98 (1982).
- 549 13. Foerde, K. What are habits and do they depend on the striatum? A view from the  
550 study of neuropsychological populations. *Curr. Opin. Behav. Sci.* **20**, 17–24 (2018).
- 551 14. Tricomi, E., Balleine, B. W. & O'Doherty, J. P. A specific role for posterior dorsolateral  
552 striatum in human habit learning. *Eur. J. Neurosci.* **29**, 2225–32 (2009).
- 553 15. Valentin, V. V., Dickinson, A. & O'Doherty, J. P. Determining the neural substrates of  
554 goal-directed learning in the human brain. *J. Neurosci.* **27**, 4019–4026 (2007).
- 555 16. Watson, P., Wiers, R. W., Hommel, B. & De Wit, S. Working for food you don't desire.  
556 Cues interfere with goal-directed food-seeking. *Appetite* **79**, 139–148 (2014).
- 557 17. Watson, P. & de Wit, S. Current limits of experimental research into habits and future  
558 directions. *Curr. Opin. Behav. Sci.* **20**, 33–39 (2018).
- 559 18. Luque, D., Molinero, S., Watson, P., López, F. J. & Le Pelley, M. E. Measuring habit  
560 formation through goal-directed response switching. *J. Exp. Psychol. Gen.* **149**, 1449–  
561 1459 (2020).
- 562 19. Lehéricy, S. *et al.* Distinct basal ganglia territories are engaged in early and advanced  
563 motor sequence learning. *Proc. Natl. Acad. Sci. U. S. A.* **102**, 12566–12571 (2005).
- 564 20. Tanaka, S. C., Balleine, B. W. & O'Doherty, J. P. Calculating consequences: Brain  
565 systems that encode the causal effects of actions. *J. Neurosci.* **28**, 6750–6755 (2008).
- 566 21. Jankowski, J., Scheef, L., Hüppe, C. & Boecker, H. Distinct striatal regions for  
567 planning and executing novel and automated movement sequences. *Neuroimage* **44**,

## Everyday life & Experimental Habits

- 568 1369–1379 (2009).
- 569 22. Patterson, T. K. & Knowlton, B. J. Subregional specificity in human striatal habit  
570 learning: a meta-analytic review of the fMRI literature. *Curr. Opin. Behav. Sci.* **20**, 75–  
571 82 (2018).
- 572 23. de Wit, S. *et al.* Corticostriatal connectivity underlies individual differences in the  
573 balance between habitual and goal-directed action control. *J. Neurosci.* **32**, 12066–  
574 12075 (2012).
- 575 24. Brovelli, A., Nazarian, B., Meunier, M. & Boussaoud, D. Differential roles of caudate  
576 nucleus and putamen during instrumental learning. *Neuroimage* **57**, 1580–90 (2011).
- 577 25. Smith, K. S. & Graybiel, A. M. Habit formation. *Dialogues Clin. Neurosci.* **18**, 33–43  
578 (2016).
- 579 26. de Wit, S. *et al.* Shifting the balance between goals and habits: Five failures in  
580 experimental habit induction. *J. Exp. Psychol. Gen.* **147**, 1043–1065 (2018).
- 581 27. Pool, E. *et al.* Determining the effects of training duration on the behavioral  
582 expression of habitual control in humans: a multi-laboratory investigation. 48 (2021).  
583 doi:10.31234/OSF.IO/Z756H
- 584 28. Wechsler, K. *et al.* Multitasking during simulated car driving: A comparison of young  
585 and older persons. *Front. Psychol.* **9**, 910 (2018).
- 586 29. Worringer, B. *et al.* Common and distinct neural correlates of dual-tasking and task-  
587 switching: a meta-analytic review and a neuro-cognitive processing model of human  
588 multitasking. *Brain Struct. Funct.* **224**, 1845–1869 (2019).
- 589 30. Ceceli, A. O., Myers, C. E. & Tricomi, E. Demonstrating and disrupting well-learned  
590 habits. *PLoS One* **15**, 1–28 (2020).
- 591 31. Cummine, J. *et al.* Understanding the Role of Speech Production in Reading:

## Everyday life & Experimental Habits

- 592 Evidence for a Print-to-Speech Neural Network Using Graphical Analysis.  
593 *Neuropsychology* **30**, 385–97 (2016).
- 594 32. Yang, Y. *et al.* Neural correlates of orthographic access in Mandarin Chinese writing:  
595 An fMRI study of the word-frequency effect. *Front. Behav. Neurosci.* **12**, 1–12 (2018).
- 596 33. Lin, Z., Tam, F., Churchill, N. W., Schweizer, T. A. & Graham, S. J. Tablet technology  
597 for writing and drawing during functional magnetic resonance imaging: A review.  
598 *Sensors (Switzerland)* **21**, 1–22 (2021).
- 599 34. Martínez, M., Villagra, F., Castellote, J. M. & Pastor, M. A. Kinematic and kinetic  
600 patterns related to free-walking in parkinson's disease. *Sensors (Switzerland)* **18**,  
601 (2018).
- 602 35. Huth, A. G., De Heer, W. A., Griffiths, T. L., Theunissen, F. E. & Gallant, J. L. Natural  
603 speech reveals the semantic maps that tile human cerebral cortex. *Nature* **532**, 453–  
604 458 (2016).
- 605 36. Martínez, M. *et al.* Trade-off between frequency and precision during stepping  
606 movements: Kinematic and BOLD brain activation patterns. *Hum. Brain Mapp.* **37**,  
607 1722–1737 (2016).
- 608 37. Oberhuber, M. *et al.* Functionally distinct contributions of the anterior and posterior  
609 putamen during sublexical and lexical reading. *Front. Hum. Neurosci.* (2013).  
610 doi:10.3389/fnhum.2013.00787
- 611 38. Varotto, S. F., Farah, H., Bogenberger, K., van Arem, B. & Hoogendoorn, S. P.  
612 Adaptations in driver behaviour characteristics during control transitions from full-  
613 range Adaptive Cruise Control to manual driving: an on-road study. *Transp. A Transp.*  
614 *Sci.* **16**, 776–806 (2020).
- 615 39. Karimpoor, M. *et al.* A computerized tablet with visual feedback of hand position for

## Everyday life & Experimental Habits

- 616 functional magnetic resonance imaging. *Front. Hum. Neurosci.* **9**, 1–13 (2015).
- 617 40. Choi, M. H. *et al.* Increase in brain activation due to subtasks during driving: FMRI  
618 study using new MR-compatible driving simulator. *J. Physiol. Anthropol.* **36**, 1–12  
619 (2017).
- 620 41. Haynes, W. I. A. & Haber, S. N. The organization of prefrontal-subthalamic inputs in  
621 primates provides an anatomical substrate for both functional specificity and  
622 integration: Implications for basal ganglia models and deep brain stimulation. *J.*  
623 *Neurosci.* **33**, 4804–4814 (2013).
- 624 42. Eickhoff, S. B. *et al.* Coordinate-based activation likelihood estimation meta-analysis  
625 of neuroimaging data: A random-effects approach based on empirical estimates of  
626 spatial uncertainty. *Hum. Brain Mapp.* **30**, 2907–2926 (2009).
- 627 43. Turkeltaub, P. E., Eden, G. F., Jones, K. M. & Zeffiro, T. A. Meta-analysis of the  
628 functional neuroanatomy of single-word reading: Method and validation. *Neuroimage*  
629 **16**, 765–780 (2002).
- 630 44. Lancaster, J. L. *et al.* Bias between MNI and talairach coordinates analyzed using the  
631 ICBM-152 brain template. *Hum. Brain Mapp.* **28**, 1194–1205 (2007).
- 632 45. Eickhoff, S. B. *et al.* Behavior, sensitivity, and power of activation likelihood estimation  
633 characterized by massive empirical simulation. *Neuroimage* **137**, 70–85 (2016).
- 634 46. Fox, P. T. *et al.* *User manual for GingerALE 2.3.* Retrieved from  
635 <http://brainmap.org/ale/manual.pdf> (2013).
- 636 47. Mazziotta, J. *et al.* A probabilistic atlas and reference system for the human brain:  
637 International Consortium for Brain Mapping (ICBM). *Philos. Trans. R. Soc. Lond. B.*  
638 *Biol. Sci.* **356**, 1293–322 (2001).
- 639 48. Higashiyama, Y., Takeda, K., Someya, Y., Kuroiwa, Y. & Tanaka, F. The neural basis

## Everyday life & Experimental Habits

- 640 of typewriting: A functional MRI study. *PLoS One* **10**, 1–20 (2015).
- 641 49. Gould, R. L., Brown, R. G., Owen, A. M., Ffytche, D. H. & Howard, R. J. fMRI BOLD  
642 response to increasing task difficulty during successful paired associates learning.  
643 *Neuroimage* **20**, 1006–1019 (2003).
- 644 50. Parkes, S. L., Bradfield, L. A. & Balleine, B. W. Interaction of insular cortex and  
645 ventral striatum mediates the effect of incentive memory on choice between goal-  
646 directed actions. *J. Neurosci.* **35**, 6464–6471 (2015).
- 647 51. Sommer, S. & Pollmann, S. Putamen Activation Represents an Intrinsic Positive  
648 Prediction Error Signal for Visual Search in Repeated Configurations. *Open*  
649 *Neuroimag. J.* **10**, 126–138 (2016).
- 650 52. Bellebaum, C., Koch, B., Schwarz, M. & Daum, I. Focal basal ganglia lesions are  
651 associated with impairments in reward-based reversal learning. *Brain* **131**, 829–841  
652 (2008).
- 653 53. Cromwell, H. C. & Schultz, W. Effects of expectations for different reward magnitudes  
654 on neuronal activity in primate striatum. *J. Neurophysiol.* **89**, 2823–2838 (2003).
- 655 54. Haruno, M. & Kawato, M. Different neural correlates of reward expectation and reward  
656 expectation error in the putamen and caudate nucleus during stimulus-action-reward  
657 association learning. *J. Neurophysiol.* **95**, 948–959 (2006).
- 658 55. Yamada, H., Matsumoto, N. & Kimura, M. Tonically Active Neurons in the Primate  
659 Caudate Nucleus and Putamen Differentially Encode Instructed Motivational  
660 Outcomes of Action. *J. Neurosci.* **24**, 3500–3510 (2004).
- 661 56. Gardiner, T. W. & Nelson, R. J. Striatal neuronal activity during the initiation and  
662 execution of hand movements made in response to visual and vibratory cues. *Exp.*  
663 *Brain Res.* **92**, 15–26 (1992).

## Everyday life & Experimental Habits

- 664 57. Wymbs, N. F., Bassett, D. S., Mucha, P. J., Porter, M. A. & Grafton, S. T. Differential  
665 Recruitment of the Sensorimotor Putamen and Frontoparietal Cortex during Motor  
666 Chunking in Humans. *Neuron* **74**, 936–946 (2012).
- 667 58. Cellini, N. Memory consolidation in sleep disorders. *Sleep Med. Rev.* **35**, 101–112  
668 (2017).
- 669 59. Andersen, K. W., Madsen, K. H. & Siebner, H. R. Discrete finger sequences are  
670 widely represented in human striatum. *Sci. Rep.* **10**, 1–12 (2020).
- 671 60. Romero, M. C., Bermudez, M. A., Vicente, A. F., Perez, R. & Gonzalez, F. Activity of  
672 neurons in the caudate and putamen during a visuomotor task. *Neuroreport* **19**, 1141–  
673 1145 (2008).
- 674 61. Cohen, Y., Schneidman, E. & Paz, R. The geometry of neuronal representations  
675 during rule learning reveals complementary roles of cingulate cortex and putamen.  
676 *Neuron* **109**, 839-851.e9 (2021).
- 677 62. Kimura, M., Kato, M. & Shimazaki, H. Physiological properties of projection neurons in  
678 the monkey striatum to the globus pallidus. *Exp. Brain Res.* **82**, 672–676 (1990).
- 679 63. Kimura, M., Rajkowski, J. & Evarts, E. Tonicly discharging putamen neurons exhibit  
680 set-dependent responses. *Proc. Natl. Acad. Sci. U. S. A.* **81**, 4998–5001 (1984).
- 681 64. Kimura, M. The role of primate putamen neurons in the association of sensory stimuli  
682 with movement. *Neurosci. Res.* **3**, 436–443 (1986).
- 683 65. Tunik, E., Houk, J. C. & Grafton, S. T. Basal ganglia contribution to the initiation of  
684 corrective submovements. *Neuroimage* **47**, 1757–1766 (2009).
- 685 66. Kunitatsu, J., Maeda, K. & Hikosaka, O. The caudal part of putamen represents the  
686 historical object value information. *J. Neurosci.* **39**, 1709–1719 (2019).
- 687 67. Peters, A. J., Fabre, J. M. J., Steinmetz, N. A., Harris, K. D. & Carandini, M. Striatal



## Everyday life & Experimental Habits

- 688 activity topographically reflects cortical activity. *Nature* **591**, 420–425 (2021).
- 689 68. Haber, S. N., Fudge, J. L. & McFarland, N. R. Striatonigrostriatal Pathways in  
690 Primates Form an Ascending Spiral from the Shell to the Dorsolateral Striatum. *J.*  
691 *Neurosci.* **20**, 2369–2382 (2000).
- 692 69. Björklund, A. & Dunnett, S. B. Dopamine neuron systems in the brain: an update.  
693 *Trends Neurosci.* **30**, 194–202 (2007).
- 694 70. Matsuda, W. *et al.* Single nigrostriatal dopaminergic neurons form widely spread and  
695 highly dense axonal arborizations in the neostriatum. *J. Neurosci.* **29**, 444–53 (2009).
- 696 71. Redgrave, P., Prescott, T. J. & Gurney, K. The basal ganglia: a vertebrate solution to  
697 the selection problem? *Neuroscience* **89**, 1009–1023 (1999).
- 698 72. Hikosaka, O. *et al.* Tutor Song Exposure Song Selectivity in the Pallial-Basal Ganglia  
699 Song Circuit of Zebra Finches Raised Without Role of the Basal Ganglia in the  
700 Control of Purposive Saccadic Eye Movements. *Physiol Rev* **80**, 953–978 (2000).
- 701 73. Schultz, W. Behavioral theories and the neurophysiology of reward. *Annu. Rev.*  
702 *Psychol.* **57**, 87–115 (2006).
- 703 74. Redgrave, P., Gurney, K. & Reynolds, J. What is reinforced by phasic dopamine  
704 signals? *Brain Research Reviews* **58**, 322–339 (2008).
- 705 75. Bromberg-Martin, E. S., Matsumoto, M. & Hikosaka, O. Dopamine in Motivational  
706 Control: Rewarding, Aversive, and Alerting. *Neuron* **68**, 815–834 (2010).
- 707 76. Ashby, F. G., Turner, B. O. & Horvitz, J. C. Cortical and basal ganglia contributions to  
708 habit learning and automaticity. *Trends in Cognitive Sciences* **14**, 208–215 (2010).
- 709 77. Ohbayashi, M., Picard, N. & Strick, P. L. Inactivation of the dorsal premotor area  
710 disrupts internally generated, but not visually guided, sequential movements. *J.*  
711 *Neurosci.* **36**, 1971–1976 (2016).

## Everyday life & Experimental Habits

- 712 78. Nachev, P., Kennard, C. & Husain, M. Functional role of the supplementary and pre-  
713 supplementary motor areas. *Nature Reviews Neuroscience* **9**, 856–869 (2008).
- 714 79. Nambu, A., Tokuno, H. & Takada, M. Functional significance of the cortico-  
715 subthalamo-pallidal ‘hyperdirect’ pathway. *Neurosci Res* **43**, 111–117 (2002).
- 716 80. Pineda-Pardo, J. A. *et al.* Static magnetic field stimulation of the supplementary motor  
717 area modulates resting-state activity and motor behavior. *Commun. Biol.* **2**, 397  
718 (2019).
- 719 81. Chen, L. L. & Wise, S. P. Neuronal activity in the supplementary eye field during  
720 acquisition of conditional oculomotor associations. *J. Neurophysiol.* **73**, 1101–1121  
721 (1995).
- 722 82. Morris, N. J. & Stein, C. M. Model-free linkage analysis of a quantitative trait. in  
723 *Methods in Molecular Biology* **1666**, 327–342 (Humana Press Inc., 2017).
- 724 83. Haber, S. N. & Knutson, B. The Reward Circuit: Linking Primate Anatomy and Human  
725 Imaging. *Neuropsychopharmacology* **35**, 4–26 (2009).
- 726 84. Leisman, G., Moustafa, A. & Shafir, T. Thinking, Walking, Talking: Integratory Motor  
727 and Cognitive Brain Function. *Front. Public Heal.* **4**, 1 (2016).
- 728 85. Smittenaar, P., FitzGerald, T. H. B., Romei, V., Wright, N. D. & Dolan, R. J. Disruption  
729 of Dorsolateral Prefrontal Cortex Decreases Model-Based in Favor of Model-free  
730 Control in Humans. *Neuron* **80**, 914–919 (2013).
- 731 86. Cunnington, R., Windischberger, C., Deecke, L. & Moser, E. The preparation and  
732 execution of self-initiated and externally-triggered movement: a study of event-related  
733 fMRI. *Neuroimage* **15**, 373–385 (2002).
- 734 87. Aron, A. R. & Poldrack, R. A. Cortical and Subcortical Contributions to Stop Signal  
735 Response Inhibition: Role of the Subthalamic Nucleus. *J. Neurosci.* **26**, 2424–2433

## Everyday life & Experimental Habits

- 736 (2006).
- 737 88. Arsalidou, M., Duerden, E. G. & Taylor, M. J. The Centre of the Brain : Topographical  
738 Model of Motor , Cognitive , Affective , and Somatosensory Functions of the Basal  
739 Ganglia. **3054**, 3031–3054 (2013).
- 740 89. McFarland, N. R. & Haber, S. N. Thalamic relay nuclei of the basal ganglia form both  
741 reciprocal and nonreciprocal cortical connections, linking multiple frontal cortical  
742 areas. *J. Neurosci.* **22**, 8117–8132 (2002).
- 743 90. Kim, H. F. & Hikosaka, O. Parallel basal ganglia circuits for voluntary and automatic  
744 behaviour to reach rewards. *Brain* **138**, 1776–1800 (2015).
- 745 91. Haber, S. N. Corticostriatal circuitry. *Dialogues Clin. Neurosci.* **18**, 7–21 (2016).
- 746 92. Gurney, K., Humphries, M. D. & Redgrave, P. A New Framework for Cortico-Striatal  
747 Plasticity: Behavioural Theory Meets In Vitro Data at the Reinforcement-Action  
748 Interface. *PLoS Biol.* **13**, e1002034 (2015).
- 749 93. Alexander, G. E. & Crutcher, M. D. Functional architecture of basal ganglia circuits:  
750 neural substrates of parallel processing. *Trends in Neurosciences* **13**, 266–271  
751 (1990).
- 752 94. Huang, Y., Yapple, Z. A. & Yu, R. Goal-oriented and habitual decisions: Neural  
753 signatures of model-based and model-free learning. *Neuroimage* **215**, 116834 (2020).
- 754 95. Liljeholm, M., Dunne, S. & O'Doherty, J. P. Differentiating neural systems mediating  
755 the acquisition vs. expression of goal-directed and habitual behavioral control. *Eur. J.*  
756 *Neurosci.* **41**, 1358–1371 (2015).
- 757 96. Eryilmaz, H. *et al.* Neural determinants of human goal-directed vs. habitual action  
758 control and their relation to trait motivation. *Sci. Rep.* **7**, 1–11 (2017).
- 759 97. Peterson, B. S. *et al.* Human basal ganglia volume asymmetries on magnetic

## Everyday life & Experimental Habits

- 760 resonance images. *Magn. Reson. Imaging* **11**, 493–498 (1993).
- 761 98. Grabenhorst, F. & Rolls, E. T. Value, pleasure and choice in the ventral prefrontal  
762 cortex. *Trends Cogn. Sci.* **15**, 56–67 (2011).
- 763 99. Hardwick, R. M., Forrence, A. D., Krakauer, J. W. & Haith, A. M. Time-dependent  
764 competition between goal-directed and habitual response preparation. *Nat. Hum.*  
765 *Behav.* **3**, 1252–1262 (2019).
- 766 100. Wong, A. L., Goldsmith, J., Forrence, A. D., Haith, A. M. & Krakauer, J. W. Reaction  
767 times can reflect habits rather than computations. *Elife* **6**, (2017).
- 768 101. Amodio, D. M. The neuroscience of prejudice and stereotyping. *Nat. Rev. Neurosci.*  
769 **15**, 670–682 (2014).
- 770 102. Vaquero, L. *et al.* Structural neuroplasticity in expert pianists depends on the age of  
771 musical training onset. *Neuroimage* **126**, 106–119 (2016).
- 772 103. Cacioppo, S. *et al.* Intention understanding over T: A neuroimaging study on shared  
773 representations and tennis return predictions. *Front. Hum. Neurosci.* **8**, 781 (2014).
- 774 104. Kim, W. *et al.* An fMRI study of differences in brain activity among elite, expert, and  
775 novice archers at the moment of optimal aiming. *Cogn. Behav. Neurol.* **27**, 173–182  
776 (2014).
- 777 105. Hernandez, L. F., Obeso, I., Costa, R. M., Redgrave, P. & Obeso, J. A. Dopaminergic  
778 Vulnerability in Parkinson Disease: The Cost of Humans' Habitual Performance.  
779 *Trends Neurosci.* **42**, 375–383 (2019).
- 780 106. Peterson, D. S. & Horak, F. B. Neural control of walking in people with parkinsonism.  
781 *Physiology* **31**, 95–107 (2016).
- 782 107. Wu, T. *et al.* Neural correlates underlying Micrographia in Parkinson's disease. *Brain*  
783 **139**, 144–160 (2016).

## Everyday life & Experimental Habits

- 784 108. de Wit, S., Barker, R. a, Dickinson, A. D. & Cools, R. Habitual versus goal-directed  
785 action control in Parkinson disease. *J Cogn Neurosci* **23**, 1218–1229 (2010).
- 786 109. Wu, T., Hallett, M. & Chan, P. Motor automaticity in Parkinson's disease. *Neurobiol.*  
787 *Dis.* **82**, 226–234 (2015).
- 788 110. Everitt, B. J. *et al.* Neural mechanisms underlying the vulnerability to develop  
789 compulsive drug-seeking habits and addiction. *Philos. Trans. R. Soc. B Biol. Sci.* **363**,  
790 3125–3135 (2008).
- 791 111. Neal, D. T., Wood, W. & Quinn, J. M. Habits: A Repeat Performance. *Curr. Dir.*  
792 *Psychol. Sci.* **15**, 198–202 (2006).
- 793 112. Lally, P., van Jaarsveld, C. H. M., Potts, H. W. W. & Wardle, J. How are habits  
794 formed: Modelling habit formation in the real world. *Eur. J. Soc. Psychol.* **40**, 998–  
795 1009 (2010).
- 796
- 797

## Everyday life & Experimental Habits

### 798 **Acknowledgments**

799 We are thankful to Blanca Caijao and Cristina Rubio (Universidad Rey Juan Carlos)  
800 for their help in article search. MM is funded by a PhD Fellowship from Instituto de Salud  
801 Carlos III (PFIS-FI720/00068). IO is funded by Instituto de Salud Carlos III (Miguel Servet,  
802 CP18/00038) and AES-ISCI (PI19/00298) from Ministry of Science and Innovation in Spain.  
803 The funders played no role in the idea, design, data collection or analysis, decision to  
804 publish or manuscript editing and writing.

### 805 **Author Contributions**

806 P.G. design, data collection, writing; M.M. design, data collection, analysis, writing;  
807 P.R. writing; D.L. design, data collection, writing; I.O. design, data collection, writing;

### 808 **Competing Interests statement**

809 The authors declare no competing interest.

### 810 **Figure Legends and Tables**

811 **Figure 1.** Hypothesis diagram on striatal role in both everyday-life and experimental habits.  
812 Activities part of daily life such as writing, reading, walking or driving were selected as  
813 everyday-life habits (see Box 1 for task measurements and details) to expect a critical  
814 striatal role in executing these habits forms. Similar striatal activities can be expected  
815 compared to experimental paradigms commonly used in the cognitive science literature.

816 **Figure 2.** Everyday-life and experimental thresholded activation maps. **a)** Axial views for the  
817 main regions. Overlap regions at the right column are shown in blue. Note that there exists  
818 activation in the cerebellar cortex for the case of everyday-life studies but it is omitted here  
819 for brevity. Z=52 view for the experimental studies is shown as an unthresholded map for  
820 visualization purposes (ALE value  $\approx 0.01$ ) **(b)** 3D striatum reconstruction showing all the  
821 activation that fall inside it. Overlap regions at the right column are shown in blue. **(c)** 3D  
822 striatum reconstruction showing the differential activation of the Everyday -life >  
823 Experimental contrast (in green) and the Experimental > Everyday-life contrast (in red).

824 **Figure 3.** Everyday-life cognitive-motor subcategories thresholded activation maps. **a)** Axial  
825 views for the main regions. Overlap regions at the right column are shown in blue. **(b)** 3D  
826 striatum reconstruction showing all the activation that fall inside it. Overlap regions at the  
827 right column are shown in blue. **(c)** Foci distribution of all the studies that fall in the striatum.  
828 Note that some foci may correspond to the same study.

829 **Figure 4.** Experimental subcategories thresholded activation maps. **a)** Axial views for the  
830 main regions. In this case there are no overlap regions at the right column. **(b)** 3D striatum

## Everyday life & Experimental Habits

831 reconstruction showing all the activation that fall inside it. In this case there are no overlap  
832 regions at the right column. **c)** Foci distribution of all the studies that fall in the striatum. Note  
833 that some foci may correspond to the same study.

**Table 1.** Everyday-life habits peaks coordinates in MNI152 space with region names from Harvard-Oxford atlas. Percentages of each brain region indicate how much activation from a cluster fall into such region. Coordinates of any activation comprising < 5% of its volume in a region are not shown for conciseness.

| Cluster ID | Volume (mm <sup>3</sup> ) | Brain regions (%)                                      | MNI peak coordinates |     |     | ALE value |
|------------|---------------------------|--------------------------------------------------------|----------------------|-----|-----|-----------|
|            |                           |                                                        | x                    | y   | z   |           |
| 1          | 8792                      | Left Putamen (53.14%)                                  | -24                  | -4  | 6   | 0.074     |
|            |                           | Left Thalamus (28.84%)                                 | -14                  | -22 | 10  | 0.04      |
|            |                           | Left Pallidum (15.74%)                                 | -23                  | -4  | 2   | 0.054     |
| 2          | 5320                      | Right Putamen (53.38%)                                 | 24                   | 4   | 6   | 0.054     |
|            |                           | Right Thalamus (20.45%)                                | 16                   | -16 | 8   | 0.035     |
|            |                           | Right Insula (13.08%)                                  | 32                   | 14  | 8   | 0.037     |
|            |                           | Right Pallidum (9.47%)                                 | 20                   | 2   | 5   | 0.037     |
| 3          | 4840                      | Left Supplementary Motor Area (42.64%)                 | -6                   | 0   | 52  | 0.035     |
|            |                           | Right Paracingulate Gyrus (15.87%)                     | 6                    | 14  | 50  | 0.031     |
|            |                           | Right Supplementary Motor Area (15.37%)                | 4                    | 8   | 56  | 0.03      |
|            |                           | Left Paracingulate Gyrus (13.06%)                      | 0                    | 8   | 53  | 0.027     |
| 4          | 3232                      | Left Precentral Gyrus (97.03%)                         | -54                  | -2  | 40  | 0.038     |
| 5          | 2416                      | Right-Cerebellum-Cortex (100%)                         | 8                    | -64 | -20 | 0.037     |
| 6          | 2368                      | Left Central Opercular Cortex (53.38%)                 | -46                  | -2  | 6   | 0.037     |
|            |                           | Left Precentral Gyrus (18.58%)                         | -56                  | 8   | 4   | 0.033     |
|            |                           | Left Inferior Frontal Gyrus pars opercularis (18.58%)  | -56                  | 10  | 24  | 0.024     |
|            |                           | Left Insula (7.09%)                                    | -44                  | -1  | 4   | 0.03      |
| 7          | 2208                      | Right Precentral Gyrus (76.09%)                        | 56                   | 12  | 32  | 0.041     |
|            |                           | Right Inferior Frontal Gyrus pars opercularis (18.48%) | 54                   | 13  | 31  | 0.036     |
|            |                           | Right Middle Frontal Gyrus (5.43%)                     | 46                   | 13  | 30  | 0.013     |
| 8          | 1152                      | Right Inferior Frontal Gyrus pars opercularis (34.03%) | 54                   | 10  | 0   | 0.035     |
|            |                           | Right Central Opercular Cortex (27.08%)                | 52                   | 6   | 2   | 0.029     |
|            |                           | Right Temporal Pole (13.89%)                           | 54                   | 10  | -2  | 0.034     |
|            |                           | Right Precentral Gyrus (11.81%)                        | -3                   | -14 | 54  | 0.022     |
|            |                           | Right Planum Polare (9.03%)                            | 53                   | 5   | -2  | 0.028     |
| 9          | 1032                      | Left Precentral Gyrus (42.64%)                         | -26                  | -8  | 56  | 0.04      |
|            |                           | Left Superior Frontal Gyrus (36.43%)                   | 6                    | 11  | 54  | 0.029     |



|  |  |                                    |    |    |    |       |
|--|--|------------------------------------|----|----|----|-------|
|  |  | Left Middle Frontal Gyrus (20.93%) | 47 | 12 | 31 | 0.025 |
|--|--|------------------------------------|----|----|----|-------|

**Table 2.** Experimental habits peaks coordinates in MNI152 space with region names from Harvard-Oxford atlas. Percentages of each brain region indicate how much activation from a cluster fall into such region. Coordinates of any activation comprising < 5% of its volume in a region are not shown for conciseness.

| Cluster ID | Volume (mm <sup>3</sup> ) | Brain regions (%)                   | MNI peak coordinates |    |     | ALE value |
|------------|---------------------------|-------------------------------------|----------------------|----|-----|-----------|
|            |                           |                                     | x                    | y  | z   |           |
| 1          | 3344                      | Right Caudate (44.74%)              | 12                   | 6  | 10  | 0.028     |
|            |                           | Right Pallidum (20.57%)             | -14                  | 5  | -6  | 0.025     |
|            |                           | Right Accumbens (15.31%)            | 10                   | 8  | -6  | 0.03      |
|            |                           | Right Putamen (10.05%)              | 14                   | 9  | -6  | 0.025     |
|            |                           | Right Thalamus (6.46%)              | 11                   | -1 | 11  | 0.02      |
| 2          | 2088                      | Left Putamen (30.27%)               | -14                  | 5  | -9  | 0.029     |
|            |                           | Left Accumbens (27.97%)             | -12                  | 6  | -10 | 0.033     |
|            |                           | Left Caudate (20.69%)               | -10                  | 4  | 4   | 0.017     |
|            |                           | Left Pallidum (12.26%)              | 14                   | 5  | -6  | 0.025     |
| 3          | 776                       | Left Putamen (98.97%)               | -30                  | -8 | -2  | 0.02      |
| 4          | 744                       | Right Insula (90.32%)               | 32                   | 22 | -4  | 0.023     |
|            |                           | Right Orbito-Frontal Cortex (9.68%) | 29                   | 22 | -7  | 0.019     |

**Box 1.** Description of most used paradigms to assess everyday-life (A) behaviours and experimental learning (B) in fMRI contexts.

| Everyday-life                                                                                                                                                                                                                                                                                                                                           | Main habitual outcomes                                                                   | Task example                                                                                       |
|---------------------------------------------------------------------------------------------------------------------------------------------------------------------------------------------------------------------------------------------------------------------------------------------------------------------------------------------------------|------------------------------------------------------------------------------------------|----------------------------------------------------------------------------------------------------|
| <p><b>READING</b></p> <p>Real words are read aloud and compared to pseudo-words reading. Depending of the nature of the study, content of words may vary (neutral, emotional, language, non-words, etc) as well as naturality (own language vs new unknown words).</p>                                                                                  | <p>Reading own language with highly familiar/frequent words</p>                          | 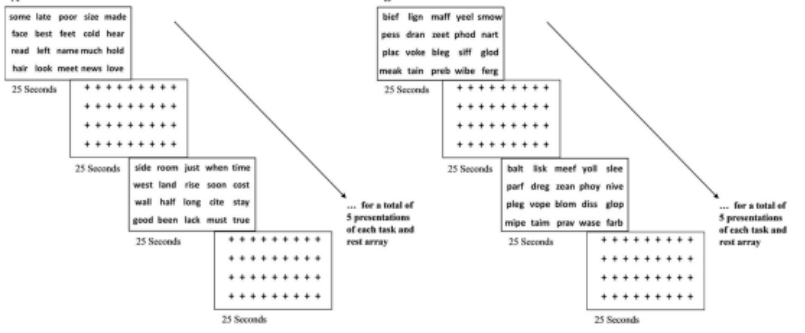 <p>(1)</p>      |
| <p><b>WRITING</b></p> <p>Participants are asked to handwrite by free natural writing, copying sentences/words, air-writing (sensorimotor control), creative writing, naming or drawing different figures.</p>                                                                                                                                           | <p>Writing own language, familiar words (compared to baseline or control conditions)</p> |  <p>(2) (3)</p> |
| <p><b>WALKING</b></p> <p>While lying down inside the scanner, participants generate walking programmes on different block conditions, including voluntary alternating strides of the lower limbs, ankle moves, stepping, rapid walking or self-paced vs externally-paced.</p>                                                                           | <p>Walking naturally at self-paced conditions</p>                                        |  <p>(4)</p>    |
| <p><b>DRIVING</b></p> <p>MR-compatible driving simulator is often used where participants are asked to naturally drive with different environmental conditions (driving only, stopping at traffic lights, turning curves, avoidance of particular stimuli) and control conditions (driving with sub-task, sub-task only, passive viewing, resting).</p> | <p>Driving in a natural environment (without distractors or dual tasks)</p>              |  <p>(5)</p>    |

(1) Cummine et al., 2016; (2) Yang et al., 2018; (3) Karimpoor et al., 2015; (4) Martínez et al., 2016; (5) Choi et al., 2017.

| B. Experimental learning                                                                                                                                                                                                                                                                                                                                                                                                                                        | Main habitual outcomes                                                         | Task example                                                                                                                                                                                                                                                                                                   |
|-----------------------------------------------------------------------------------------------------------------------------------------------------------------------------------------------------------------------------------------------------------------------------------------------------------------------------------------------------------------------------------------------------------------------------------------------------------------|--------------------------------------------------------------------------------|----------------------------------------------------------------------------------------------------------------------------------------------------------------------------------------------------------------------------------------------------------------------------------------------------------------|
| <p><b>PROBABILISTIC CLASSIFICATION TASK (PCT)</b><br/>                     Participants are shown visual cues that are probabilistically related to outcomes. Participants gradually learn the cue–outcome relationships through trial-by-trial feedback</p>                                                                                                                                                                                                    | <p>Optimal responses to stimuli</p>                                            | <p><b>Task example</b></p> <p>(a) <i>Stimulus-Outcome associations</i></p> 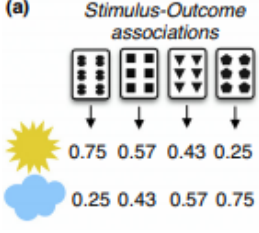 <p>(b) <i>Stimulus</i></p>  <p>(1)</p>                        |
| <p><b>TWO-STAGE REINFORCEMENT LEARNING TASK</b><br/>                     Choices at stage 1 determines which state is more probable to occur in Stage 2 that leads to reward. At each Stage 2, participants choose between two stimuli and discover whether they receive a reward or not.</p>                                                                                                                                                                   | <p>Reward sensitivity without sensitivity to transition probabilities</p>      | <p><b>Two-stage reinforcement learning task</b></p> <p>(g) <i>Stage 1 choice</i></p>  <p>(h) <i>Probability of reward</i></p>  <p>(1)</p> |
| <p><b>OUTCOME DEVALUATION TASK</b><br/>                     During the discrimination training, participants learn to discriminative cues related to right-left key presses with rewarded outcomes. During the test phase, some of these outcomes are devaluated and no longer worth any points. Participants are asked to press the correct key when a stimulus signals the still-valuable outcome or withhold responding if outcome is no longer valuable</p> | <p>Continued responding for devaluated outcomes</p>                            | <p><b>Outcome devaluation task</b></p> <p>(e) <i>Discrimination training</i></p>  <p>(f) <i>Outcome devaluation</i></p>  <p>(1)</p>     |
| <p><b>MOTOR SEQUENCE LEARNING</b><br/>                     Motor finger movements are repeated or alternated in high-frequency vs low-frequency sequences. Through repeated practice, participants learn the repeating sequences, as demonstrated by improvements in performance (speed and accuracy).</p>                                                                                                                                                      | <p>Accuracy differences between high-frequency and low frequency sequences</p> |  <p>(2)</p>                                                                                                                                                                                                                |

(1) Images obtained from Foerde et al., 2018; (2) Cellini, 2017

## Supplementary material

### Striatal role in everyday-life and laboratory-developed habits

Pasqualina Guida<sup>1,2,6\*</sup>, Mario Michiels<sup>1,2,6\*</sup>, Peter Redgrave<sup>5</sup>, David Luque<sup>3,4</sup>, Ignacio Obeso<sup>1,2</sup>

\* Co-first authors

<sup>1</sup>*CINAC, Hospital Universitario HM Puerta del Sur, Móstoles, Madrid, Spain*

<sup>2</sup>*CIBERNED, Instituto de Salud Carlos III, Madrid, Spain*

<sup>3</sup>*Departamento de Psicología Básica, Universidad Autónoma de Madrid, Madrid, Spain*

<sup>4</sup>*Departamento de Psicología Básica, Universidad de Málaga, Madrid, Spain*

<sup>5</sup>*Department of Psychology, University of Sheffield, Sheffield, S10 2TN, UK*

<sup>6</sup>*PhD program in Neuroscience, Universidad Autónoma de Madrid, 28029 Madrid, Spain*

### Methods

The complete set of search terms were as follows:

(1) Everyday life:

(walking[MeSH Terms] OR walking[Title/Abstract]) OR (Driving behaviour[MeSH Terms] OR Driving behaviour[Title/Abstract]) OR (Driving behavior[MeSH Terms] OR Driving behavior[Title/Abstract]) OR (car driving[MeSH Terms] OR Car driving[Title/Abstract]) OR (writing[MeSH Terms] OR writing[Title/Abstract]) OR (handwriting[MeSH Terms] OR handwriting[Title/Abstract]) OR (reading[Title/Abstract] OR reading[MeSH Terms]) AND (functional magnetic resonance imaging[MeSH Terms] OR fMRI[Title/Abstract]) AND ((basal ganglia[Title/Abstract] OR caudate[Title/Abstract])

OR putamen[Title/Abstract] OR striatum[Title/Abstract]) OR (basal ganglia[MeSH Terms] OR caudate nucleus[MeSH Terms] OR putamen[MeSH Terms] OR striatum[MeSH Terms]))

(2) Experimental:

("habit" OR "habits" OR "probabilistic classification" OR "weather prediction" OR "response learning" OR "instrumental conditioning" OR "instrumental learning" OR "reinforcement learning" OR "outcome devaluation" OR "sequential decision" OR "two step" OR "2 step") AND ("basal ganglia" OR "caudate" OR "putamen" OR "striatum") AND ("fMRI" OR "functional magnetic resonance imaging" OR "functional MRI") AND ("2017/06/22"[PDAT] : "3000/12/31"[PDAT])

**Table S1.** Studies with everyday-life habits included in the meta-analysis.

| Study by domain           | n = 1441 | Foci | Task                                                                                         | Contrast                                           | Statistical threshold                                                |
|---------------------------|----------|------|----------------------------------------------------------------------------------------------|----------------------------------------------------|----------------------------------------------------------------------|
| <i>Writing</i>            |          |      |                                                                                              |                                                    |                                                                      |
| Katanoda et al. (2001)    | 17       | 19   | Write a name of an object or naming the object                                               | Writing > naming                                   | p < 0.001 voxel-level & p < 0.05 cluster-level corrected             |
| Nakamura et al. (2002)    | 9        | 10   | Upon auditory presentation subjects wrote kanji word.                                        | Writing > Rest                                     | p < 0.05 corrected for multiple comparison                           |
| Beeson et al. (2003)      | 12       | 29   | Writing words or drawing circles                                                             | Writing words > drawing circles                    | p < 0.001 uncorrected                                                |
| Hu Xing-yue et al. (2006) | 10       | 11   | Writing with a pencil                                                                        | Main Effect of Writing with a pencil               | p < 0.0001 uncorrected                                               |
| Segal et al. (2011)       | 9        | 19   | Writing or naming pictures of objects and drawing one loop per syllable of the object's name | Writing > naming plus loops                        | p < 0.05 corrected                                                   |
| Horovitz et al. (2013)    | 13       | 5    | Writing, tapping, and zigzagging with each limb                                              | Right-handwriting > other tasks                    | p < 0.001 FWE corrected                                              |
| Erhard et al. (2014)      | 20       | 13   | Creative writing                                                                             | Main effects of creative writing in expert writers | p < 0.05 FWE corrected                                               |
| Longcamp et al. (2014)    | 18       | 13   | Writing of letters or digits                                                                 | Writing > holding the pen still                    | p < 0.05 voxel-level FWE corrected                                   |
| Potgieser et al. (2015)   | 16       | 21   | Write a sentence or hand tapping                                                             | Right-handwriting > right-hand tapping             | p < 0.001 voxel-level & p < 0.05 cluster-level FWE corrected & k ≥ 8 |
| Bisio et al. (2017)       | 7        | 25   | Writing sentences                                                                            | Writing > resting                                  | p < 0.05 FWE corrected                                               |
| Karimpoor et al. (2018)   | 12       | 38   | Copying grocery lists, phone numbers or sentences                                            | All handwriting tasks > resting                    | p < 0.05 FDR corrected                                               |
| Yang et al. (2018)        | 34       | 29   | Copying chinese characters                                                                   | Writing high frequency > writing low frequency     | p < 0.05 FDR corrected                                               |
| <i>Reading</i>            |          |      |                                                                                              |                                                    |                                                                      |
| Bookheimer et al. (1995)  | 16       | 33   | Reading words or naming objects                                                              | Main effect of read aloud                          | p < 0.001 corrected                                                  |
| Moore et al. (1999)       | 8        | 7    | Reading/naming                                                                               | Main effect of reading words                       | p < 0.001 uncorrected                                                |
| Mechelli et al. (2003)    | 20       | 10   | Early/late reading processing                                                                | Early reading > Fixation                           | p < 0.05 corrected                                                   |
| Buchsbaum et al. (2005)   | 17       | 15   | Reading/Hearing                                                                              | Reading > Control                                  | z > 2.33 & p < 0.01 cluster-corrected                                |
| Vigneau et al. (2005)     | 23       | 39   | Reading words/ non reading letters                                                           | Read > Cross fixation                              | p < 0.001 uncorrected                                                |
| Meschyan et al. (2006)    | 12       | 12   | Reading different languages                                                                  | Reading > Resting                                  | p < 0.001 uncorrected & p < 0.05 corrected spatial extent threshold  |
| Binder et al. (2006)      | 30       | 31   | Non-word reading                                                                             | Reading > Fixation                                 | p < 0.00001 uncorrected & p < 0.05 corrected                         |
| Carreiras et al. (2007)   | 36       | 32   | Reading/Lexical decision                                                                     | Reading > Baseline                                 | p < 0.05 corrected                                                   |
| Church et al. (2008)      | 50       | 37   | Reading/Repeat                                                                               | Reading > Repeat                                   | p < 0.05 corrected with k ≥ 24 voxels                                |
| Yarkoni et al. (2008)     | 28       | 21   | Reading/Comprehension/lexical decision                                                       | Reading > Fixation                                 | p < 0.05 uncorrected                                                 |
| Seghier et al. (2008)     | 43       | 5    | Reading aloud/fixation                                                                       | Reading > Fixation                                 | p < 0.05 corrected                                                   |
| Seghier et al. (2010)     | 28       | 5    | Reading aloud/naming                                                                         | Reading > Fixation                                 | p < 0.05 corrected                                                   |
| Oberhuber et al. (2013)   | 25       | 6    | Reading/naming                                                                               | Reading > Naming                                   | p < 0.05, cluster level FWE-corrected                                |
| Vannest et al. (2013)     | 49       | 11   | Reading/Generate words                                                                       | Reading > Generate words                           | p ≤ 0.01 voxel-level corrected & t ≥ 7.5, cluster size 30            |

|                         |    |    |                                                     |                                   |                                                              |
|-------------------------|----|----|-----------------------------------------------------|-----------------------------------|--------------------------------------------------------------|
| Hsu et al. (2015)       | 24 | 35 | Reading emotional or neutral sentences              | Reading > Resting                 | p < 0.005 voxel-level & p < 0.05 cluster-level FDR corrected |
| Rueckl et al. (2015)    | 84 | 18 | Reading/Hearing                                     | Reading > Resting                 | p < 0.001 FDR corrected                                      |
| Cummine et al. (2016)   | 15 | 19 | Reading words/pseudowords                           | Main effect of reading real words | p < 0.001 uncorrected                                        |
| Oberhuber et al. (2016) | 26 | 22 | Reading words/ pseudowords or naming object/ colors | Reading words > other conditions  | p < 0.05 FWE corrected                                       |
| Cheema et al. (2018)    | 19 | 3  | Reading words / non words                           | Reading > Control                 | p < 0.0001 uncorrected                                       |

### *Walking*

|                            |     |    |                                                               |                                                                         |                                                                    |
|----------------------------|-----|----|---------------------------------------------------------------|-------------------------------------------------------------------------|--------------------------------------------------------------------|
| Ciccarellet al. (2005)     | 16  | 9  | Right-left foot passive movement                              | Passive > Active movement                                               | p < 0.05 corrected                                                 |
| Christensen et al. (2007)  | 18  | 10 | Externally generated movement with or without visual feedback | Conjunctions of externally generated movements (regardless of feedback) | p < 0.05 FDR corrected                                             |
| la Fougère et al. (2010)   | 16  | 14 | Real locomotion                                               | Walking > Resting condition                                             | p < 0.05 FDR corrected                                             |
| Trinastic et al (2010)     | 8   | 24 | Active ankle dorsiflexion                                     | Ankle dorsiflexion > Plantarflexion                                     | p < 0.05                                                           |
| Swinnen et al. (2010)      | 14  | 49 | 90° out-of-phase versus iso task                              | 90° Left > Iso directional Left                                         | p < 0.001 FDR corrected                                            |
| Toyomura et al. (2012)     | 12  | 9  | Self-paced condition                                          | Self > Externally paced                                                 | p < 0.0001 & k <sub>≥</sub> 10 uncorrected; p < 0.05 FWE corrected |
| Sauvagea et al. (2013)     | 12  | 29 | Speed execution task                                          | Fast execution > low execution                                          | p < 0.05 corrected                                                 |
| Martinez et al. (2014)     | 19  | 20 | Stepping condition                                            | Main effect of walking                                                  | p < 0.001 FDR corrected                                            |
| Lukas Jaeger et al. (2014) | 20  | 24 | Active stepping                                               | Main effect active walking                                              | p < 0.001 cluster-level corrected & k <sub>≥</sub> 42 voxels       |
| Noble et al. (2014)        | 11  | 24 | Bilateral plantarflexion exertion against physical resistance | Bilateral > Unilateral                                                  | p < 0.01 FWE corrected                                             |
| Martín et al. (2016)       | 19  | 16 | Pseudo-gait                                                   | Main effect of stability of stepping frequencies                        | p < 0.05 FWE corrected                                             |
| Marchal et al. (2019)      | 20  | 7  | Virtual gait task with doorway                                | Gait doorway > Walkway doorway                                          | p < 0.001 uncorrected                                              |
| Peters et al. (2019)       | 22  | 13 | Ankle Task                                                    | Ankle main effect                                                       | p < 0.005 uncorrected                                              |
| Allali G et al. (2019)     | 326 | 6  | Varying walking speeds                                        | Rapid walking > Normal walking speed                                    | p < 0.05 cluster-level corrected                                   |

### *Driving*

|                        |    |    |                                                    |                                                                                                                                  |                                                          |
|------------------------|----|----|----------------------------------------------------|----------------------------------------------------------------------------------------------------------------------------------|----------------------------------------------------------|
| Uchiyama et al. (2003) | 21 | 18 | Driving simulator task                             | Active > Passive driving                                                                                                         | p < 0.05 cluster-level FWE corrected                     |
| Graydon et al. (2004)  | 6  | 70 | Driving simulator task                             | Simulated driving > Fixation                                                                                                     | p < 0.05 corrected                                       |
| Spiers et al. (2007)   | 20 | 8  | The getaway game                                   | Turning L > Turning R                                                                                                            | p < 0.001 uncorrected & k <sub>≥</sub> 5                 |
| Callan et al. (2009)   | 14 | 18 | In-car video assist system                         | Driver's perspective with truck blocking viewing > driver's perspective occluded with a video from the perspective of the camera | p < 0.05 FDR corrected                                   |
| Hsieh et al. (2009)    | 28 | 23 | Static Load Paradigm                               | Driving video no distractor > fixation                                                                                           | p < 0.0001 corrected                                     |
| Chein et al. (2011)    | 40 | 2  | Stoplight driving game                             | Drive peer > alone                                                                                                               | p < 0.05 FWE corrected                                   |
| Uchiyama et al. (2012) | 18 | 17 | Driving simulator task (with dual task conditions) | Driving main effect                                                                                                              | p < 0.001 voxel level & p < 0.05 cluster level corrected |
| Chung et al. (2014)    | 16 | 22 | Driving simulator task                             | Driving only > Driving with task                                                                                                 | p < 0.05 corrected                                       |

Choi et al. (2017) 15 25 Driving simulator task Driving with subtask condition > Control  $p < 0.05$  FDR corrected

FWE: family-wise error; FDR: false-discovery rate

**Table S2.** Studies with experimental habits included in the meta-analysis.

| Study by domain               | n = 973 | Foci | Task                               | Contrast (short)                                                             | Statistical threshold                                                                        |
|-------------------------------|---------|------|------------------------------------|------------------------------------------------------------------------------|----------------------------------------------------------------------------------------------|
| <i>Probabilistic learning</i> |         |      |                                    |                                                                              |                                                                                              |
| Poldrack et al. (1999)        | 8       | 15   | Probabilistic learning task        | Task > control (perceptual-motor)                                            | $p < 0.05$ corrected with Gaussian Random Field Theory                                       |
| Poldrack et al. (2001)        | 13      | 25   | Probabilistic learning task        | Task > control (perceptual-motor)                                            | $p < 0.005$ uncorrected & $k \geq 5$ voxels                                                  |
| Aron et al. (2004)            | 15      | 9    | Probabilistic learning task        | Task > baseline                                                              | $p < 0.05$ FDR corrected                                                                     |
| Delgado et al. (2005)         | 17      | 2    | Probabilistic learning task        | Condition and time interaction                                               | $p < 0.0001$ uncorrected & $k \geq 5$ voxels                                                 |
| Fera et al. (2005)            | 18      | 5    | Probabilistic learning task        | Task > control (perceptual-motor)                                            | $p < 0.05$ uncorrected                                                                       |
| Aron et al. (2006)            | 8       | 9    | Probabilistic learning task        | Task > control (perceptual-motor)                                            | $z > 2.3$ voxel-level & $p < 0.01$ cluster-level corrected with Gaussian Random Field Theory |
| Foerde et al. (2006)          | 14      | 2    | Probabilistic learning task        | Modulation by performance (accuracy)                                         | $p < 0.05$ corrected with Gaussian Random Field Theory                                       |
| Glascher et al. (2010)        | 18      | 1    | 2-step probabilistic learning task | RPE                                                                          | $p < 0.006$ corrected & $k \geq 10$                                                          |
| Celone et al. (2011)          | 19      | 8    | Probabilistic learning task        | Task > control (perceptual-motor)                                            | $p < 0.01$ voxel-level & $p < 0.05$ cluster-level corrected                                  |
| Wunderlich et al. (2012)      | 21      | 17   | 2-step probabilistic learning task | Trained > Planning (RPE)                                                     | $p < 0.05$ FWE corrected & $k \geq 5$                                                        |
| Soares et al. (2012)          | 12      | 10   | Probabilistic learning task        | Stress > control                                                             | $p < 0.05$ FWE corrected                                                                     |
| Schwabe et al. (2013)         | 75      | 14   | Probabilistic learning task        | Task > control (perceptual-motor)                                            | $p < 0.05$ FWE corrected & $k \geq 5$                                                        |
| Lee et al. (2014)             | 22      | 5    | 2-step probabilistic learning task | RPE                                                                          | $p < 0.05$ FWE corrected                                                                     |
| Deserno et al. (2015)         | 29      | 7    | 2-step probabilistic learning task | Model-free component                                                         | $p < 0.05$ corrected                                                                         |
| Doll et al. (2015)            | 20      | 5    | 2-step probabilistic learning task | RPE                                                                          | $p \leq 0.0005$ cluster-level FWE corrected                                                  |
| Dunne et al. (2016)           | 17      | 3    | Probabilistic learning task        | RPE                                                                          | $p < 0.05$ corrected                                                                         |
| Oh-Descher et al. (2017)      | 25      | 3    | Probabilistic learning task        | High time pressure > low time pressure (Positive subjective sum of evidence) | $p < 0.005$ voxel-level & $p < 0.05$ cluster-level corrected                                 |
| Nebe et al. (2017)            | 146     | 35   | 2-step probabilistic learning task | RPE                                                                          | $p < 0.05$ FWE corrected                                                                     |
| Erdeniz et al. (2019)         | 19      | 15   | Probabilistic learning task        | CS familiar > CS novel                                                       | $p < 0.005$ uncorrected                                                                      |
| Mas-Herrero et al. (2019)     | 20      | 2    | 2-step probabilistic learning task | RPE (pseudofeedback)                                                         | $p < 0.001$ corrected                                                                        |
| <i>Others</i>                 |         |      |                                    |                                                                              |                                                                                              |
| Gottfried et al. (2003)       | 13      | 7    | Associative learning               | Outcome devaluation                                                          | $p < 0.001$ uncorrected                                                                      |
| Iaria et al. (2003)           | 7       | 5    | Maze navigation                    | Task > control (perceptual-motor)                                            | $p < 0.05$ corrected                                                                         |
| Lehéricy et al. (2005)        | 14      | 3    | Motor sequence learning            | Modulation by task experience                                                | $p < 0.0001$ voxel-level & $p < 0.05$ cluster-level corrected                                |
| Forstmann et al. (2008)       | 19      | 3    | Moving dots task                   | Speed > accuracy                                                             | $p < 0.001$ corrected                                                                        |



|                               |    |    |                         |                                                                              |                                                              |
|-------------------------------|----|----|-------------------------|------------------------------------------------------------------------------|--------------------------------------------------------------|
| Fernández-Seara et al. (2009) | 14 | 30 | Motor sequence learning | Late > early                                                                 | $p < 0.01$ uncorrected                                       |
| Tricoli et al. (2009)         | 15 | 4  | Discriminative learning | Late > early                                                                 | $p < 0.001$ uncorrected & $k \geq 5$                         |
| Worthy et al. (2010)          | 18 | 1  | State maximizing        | State-change uncertainty                                                     | $p < 0.05$ corrected                                         |
| Steele et al. (2010)          | 15 | 14 | Motor sequence learning | Late > early                                                                 | $p < 0.001$ uncorrected & $k \geq 100$                       |
| Broccoli et al. (2011)        | 14 | 3  | Discriminative learning | $P(\text{correct}   \text{past observations}) > P(\text{correct by chance})$ | $p < 0.05$ FWE corrected                                     |
| Beierholm et al. (2011)       | 23 | 11 | Sequential choice       | Model-free component                                                         | $p < 0.001$ uncorrected & $k \geq 5$                         |
| De Wit et al. (2012)          | 24 | 3  | Discriminative learning | Negative predictors of goal-directed action (outcome devaluation)            | $p < 0.005$ uncorrected & $k \geq 20$                        |
| Etchamendy et al. (2012)      | 15 | 3  | Maze navigation         | Q-signal, learners                                                           | $p < 0.05$ corrected                                         |
| Liljeholm et al. (2012)       | 15 | 4  | Sequential choice       | Decreased activity in the R-O but not in the S-R                             | $p < 0.05$ corrected with cluster size thresholding          |
| Liljeholm et al. (2015)       | 19 | 13 | Sequential choice       | Modulation by devaluation insensitivity                                      | $p < 0.05$ cluster-level corrected                           |
| Fermin et al. (2016)          | 18 | 9  | Grid-Sailing            | Previous S-R learning – Model-based conditions                               | $p < 0.0001$ uncorrected                                     |
| Eryilmaz et al. (2017)        | 72 | 5  | Discriminative learning | Incongruent > standard cue                                                   | $p < 0.001$ voxel-level & $p < 0.05$ cluster-level corrected |
| Van Steenbergen et al. (2017) | 19 | 5  | Discriminative learning | Cue-driven > Value-driven action control                                     | $p < 0.001$ uncorrected & $k \geq 15$                        |
| Zwosta et al. (2018)          | 53 | 29 | Discriminative learning | Decrease reward and no reward (Contingency degradation)                      | $p < 0.001$ voxel-level & $p < 0.05$ cluster-level corrected |
| Watson et al. (2018)          | 23 | 8  | Discriminative learning | Slip of action trials > still-valued responses                               | $p < 0.05$ corrected                                         |
| Anggraini et al. (2018)       | 27 | 16 | Maze navigation         | Model-free component                                                         | $p < 0.001$ voxel-level & $p < 0.05$ cluster-level corrected |

RPE: reward prediction error; CS: conditioned stimuli; Q-signal: quality of state-action pairs; S-R: stimulus-response; R-O: response-outcome; FWE: family-wise error; FDR: false-discovery rate

**Figure S1.** PRISMA chart describing the steps followed in the selection of studies.

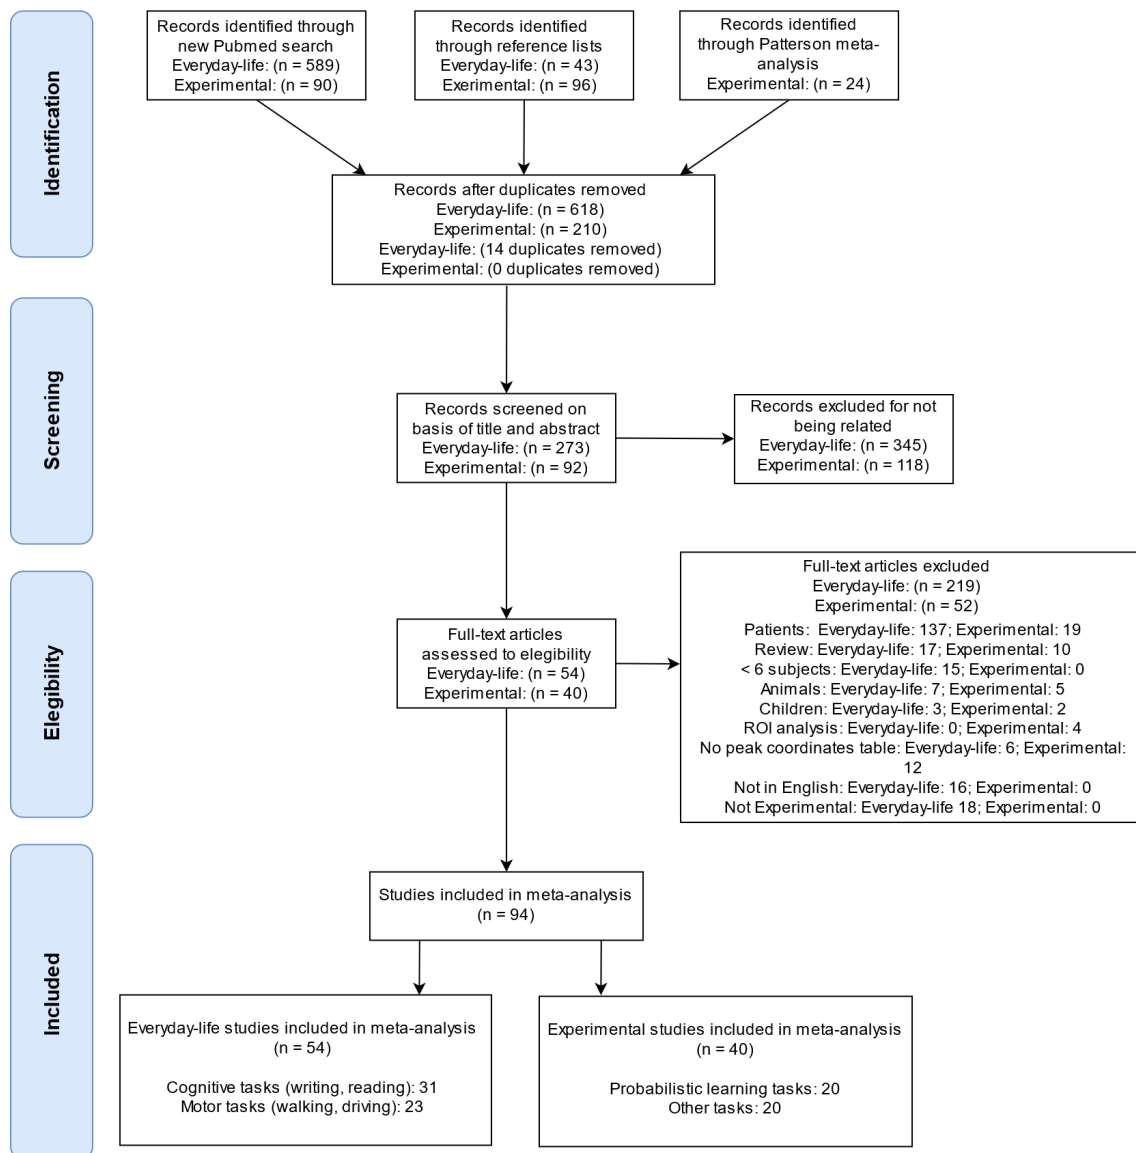

Source: https://www.biorxiv.org/content/10.1101/2021.07.02.450904v1.full.pdf
